# Supplementary material for: Intermolecular acetaldehyde and dimethoxymethane formation mechanisms via ethenol and methoxymethylene precursors in reactions of atomic carbon with methanol: a computational study
Source: Royal Society of Chemistry journal article supplement (doi:10.1039/c2cp23127a), 2011-11-24
Supplement: c2cp23127a.pdf [file c2cp23127a.pdf]

# Intermolecular Acetaldehyde and Dimethoxymethane Formation Mechanisms via Ethenol and Methoxymethylene Precursors in Reactions of Atomic Carbon with Methanol; A Computational Study

*Yavuz Dede<sup>\*, †</sup> and Ilker Ozkan<sup>\*, ‡</sup>*

<sup>†</sup>Department of Chemistry, Faculty of Science, Gazi University, Teknikokullar, Ankara 06500,  
Turkey

<sup>‡</sup>Department of Chemistry, Faculty of Arts and Sciences, Middle East Technical University, Ankara  
06800, Turkey

[dede@gazi.edu.tr](mailto:dede@gazi.edu.tr); [ilker@metu.edu.tr](mailto:ilker@metu.edu.tr)

## **Details of the Computational Procedure, Applicability of Coupled Clusters Approach, and Benchmarking Details of the Preferred Level of Theory**

In inspecting the entrance channel of the  $C(^1D)$  reaction where the reactants as well as the addition complexes might have significant multi-reference character, originating from the five-fold degeneracy of the  $^1D$  state of carbon atom, employing a single determinant approach is questionable. For similar concerns our work on  $C+H_2O$  system mainly used MCSCF approaches, however the energy difference of  $C(^1D) + H_2O$  was off by 3.3 and 4.1 kcal/mol when MCQDPT2 with two different active spaces is employed. On the other hand that error is only 0.8 kcal/mol with the CCSD(T)/cc-pVTZ methodology which is one system where the single reference CCSD(T) formalism is expected to be error prone at first glance. This agreement is mainly due to fortuitous error cancellation among species with similar electronic structure such as initial closed shell species on the OH-insertion path and two important open-shell singlet species on the CH-insertion path. (vide infra) Below MCSCF calculations on selected species as well as a through analysis of electronic states of atomic carbon are presented. The discussion is firstly on the absolute energies of  $^3P$ ,  $^1D$ , and  $^1S$  carbon atoms and secondly on the multi-reference calculations regarding the initial phase of  $C(^1D) + CH_3OH$  reaction.

### **I. Full CI Benchmarking of Carbon Atom Total Energies**

CCSD(T) is a powerful and practical approach whose performance in achieving chemical accuracy is tied to an adequate single reference description of the electronic state of interest. Electronic states that require more than one Hartree-Fock determinant for a qualitatively correct description need special attention. This problem of substantial multireference character is present in the reactions of singlet  $C(^1D)$  atoms studied in this work. The most difficult part of the singlet PES involves the initial path of attack of the  $C(^1D)$  atom to the substrate. Indeed, the isolated  $C(^1D)$  atom with five-fold spatial degeneracy has this problem as none of the five states can be adequately approximated by a single determinant. For a given basis set and a specified electronic spin, exact solutions of the nonrelativistic Schrodinger equation can be obtained by a full CI calculation. Carbon atom is a small system for which full CI calculations with relatively large basis sets are feasible. The CCSD(T) method for the same spin state and using the same basis set as in CI provides an approximation to the lowest eigenvalue of the CI matrix. Thus for a given basis set, absolute accuracy of CCSD(T) method for each spin state can be determined by comparing CCSD(T) energy against the lowest eigenvalue of the CI matrix.

Table S1 lists the absolute energies of the three terms obtained by full-valence (the core 1s electrons are not correlated) CI calculations with three different basis sets. Table S2 shows the absolute energies of the  $^3\text{P}$  and  $^1\text{D}$  states calculated with CCSD(T) method using three different basis sets.

**Table S1.** Full-valence CI absolute energies (hartrees) of the lowest three terms of carbon atom using three basis sets of increasing size

| Basis set   | $E_{\text{electronic}}(\text{AU})$ |              |              |
|-------------|------------------------------------|--------------|--------------|
|             | $^3\text{P}$                       | $^1\text{D}$ | $^1\text{S}$ |
| 6-311G(d,p) | -37.767049                         | -37.712809   | -37.661885   |
| cc-pVTZ     | -37.781280                         | -37.732046   | -37.679057   |
| cc-pVQZ     | -37.786813                         | -37.739354   | -37.686958   |

**Table S2.** CCSD(T)-FC absolute energies (hartrees) for the lowest triplet and singlet terms of carbon atom versus basis set

| Basis set   | $E_{\text{electronic}}(\text{AU})$ |              |
|-------------|------------------------------------|--------------|
|             | $^3\text{P}$                       | $^1\text{D}$ |
| 6-311G(d,p) | -37.766669                         | -37.708155   |
| cc-pVTZ     | -37.780762                         | -37.727207   |
| cc-pVQZ     | -37.786540                         | -37.734696   |

Full-CI and CCSD(T) energy differences being minor, in an absolute fashion is noteworthy and suggests a better performance of CCSD(T) on energy differences. Table S3 compares relative energies of the two singlets against the experimentally known values.

**Table S3.** Full-valence CI energies (kcal/mol) of the two lowest singlet terms relative to the ground term  $^3\text{P}$  of carbon atom versus basis set

| Basis set   | $E_{\text{rel}}(\text{kcal/mol})$ |              |
|-------------|-----------------------------------|--------------|
|             | $^1\text{D}$                      | $^1\text{S}$ |
| 6-311G(d,p) | 34.0                              | 66.0         |
| cc-pVTZ     | 30.9                              | 64.1         |
| cc-pVQZ     | 29.8                              | 62.7         |
| Exp.        | 29.1                              | 61.9         |

Use of cc-pVTZ basis set appears to produce sufficiently high quality results and the costly improvement achieved by employing cc-pVQZ may not be of interest depending on the system under study. Table S4 shows the absolute errors in the CCSD(T) energies as a function of basis set size.

**Table S4.** Difference (kcal/mol) between CCSD(T)-FC and CI-FC absolute energies for the lowest triplet and singlet terms of carbon atom versus basis set

| Basis set   | $E_{\text{rel}}(\text{kcal/mol})$ |              |
|-------------|-----------------------------------|--------------|
|             | $^3\text{P}$                      | $^1\text{D}$ |
| 6-311G(d,p) | 0.24                              | 2.92         |
| cc-pVTZ     | 0.32                              | 3.04         |
| cc-pVQZ     | 0.17                              | 2.92         |

It is seen that errors in both the singlet and triplet CCSD(T) values are nearly independent of basis set size. For the triplet, the CCSD(T) method almost exactly reproduces the computationally much more expensive CI results. Apparently the contribution of connected quadruple excitations (omitted in CCSD(T) formalism) to the energy of the triplet is not significant. On the other hand, the error of about 3 kcal/mol in the CCSD(T) values for the singlet state is attributable to these missing quadruple excitations. The improvement by using iterative instead of perturbative triple excitations and adding the connected quadruple excitations are given in Table S5.

**Table S5.** CCSD(T)-FC, CCSDT-FC, CCSDTQ-FC, and full-CI-FC energy comparison for C(<sup>1</sup>D)

| Method              | <sup>1</sup> D - E <sub>electronic</sub><br>(AU) | Δ E <sub>rel</sub> CCSD(T)<br>kcal/mol | Δ E <sub>rel</sub> full-CI |
|---------------------|--------------------------------------------------|----------------------------------------|----------------------------|
| CCSD(T)/6-311G(d,p) | -37.708155                                       | 0.00                                   | 2.92                       |
| CCSDT/6-311G(d,p)   | -37.708838                                       | -0.43                                  | 2.49                       |
| CCSDTQ/6-311G(d,p)  | -37.712809                                       | -2.92                                  | 0.00                       |

Assuming the carbon atom as a 4-electron system, the CCSD(T,FC) calculation on C(1D) is lacking only the contribution from the linked quadruple excitations. When the latter are included, i.e. CCSDTQ-FC,<sup>a</sup> the results of the CC method based on the (single-reference) RHF determinant is identical to those from a full-CI calculation, excluding the core electrons, full-CI-FC. The very minor difference of CCSD(T) and CCSDT energies are also noteworthy. Thus, the “best” result on absolute energies of carbon with the quality of full-CI will be via a CCSDTQ calculation and preferentially by employing a cc-pVQZ basis or higher. Given the unaffordable cost of such calculations for the C<sub>2</sub>H<sub>4</sub>O PES, one can either carry multi-configurational calculations where necessary (the initial phase on the singlet PES in this case) or verify the quality of the computed relative energies by referencing to experimental measurements as a result of successful systematic error cancellation in the CCSD(T) methodology. Note that the above errors are in absolute energies and a system dependent error cancellation can safely render CCSD(T) energies trustworthy.

## II. Multi-reference Treatment of the Initial Species on the Singlet PES

Having studied the carbon atom electronic states, the question is whether or not an error cancellation of that sort is applicable to our system. To answer this we first point out that as long as a single

<sup>a</sup> CFOUR, a quantum chemical program package written by J.F. Stanton, J. Gauss, M.E. Harding, P.G. Szalay with contributions from A.A. Auer, R.J. Bartlett, U. Benedikt, C. Berger, D.E. Bernholdt, Y.J. Bomble, L. Cheng, O. Christiansen, M. Heckert, O. Heun, C. Huber, T.-C. Jagau, D. Jonsson, J. Jusélius, K. Klein, W.J. Lauderdale, D.A. Matthews, T. Metzroth, L.A. Mück, D.P. O'Neill, D.R. Price, E. Prochnow, C. Puzzarini, K. Ruud, F. Schifmann, W. Schwalbach, S. Stopkowitz, A. Tajti, J. Vázquez, F. Wang, J.D. Watts and the integral packages *MOLECULE* (J. Almlöf and P.R. Taylor), *PROPS* (P.R. Taylor), *ABACUS* (T. Helgaker, H.J. Aa. Jensen, P. Jørgensen, and J. Olsen), and ECP routines by A. V. Mitin and C. van Wüllen.

reference description is suitable for a species, the question is obsolete. Secondly if two species on the PES incorporate a carbon atom that very much retains its  $^1D$  character as an open shell singlet, the errors would be similar and the CCSD(T) performance on relative energies will be far better than that shown for absolute errors. Below we show that:

- (i) Except for the CH insertion complex (**15**) and the subsequent TS (**15/16a**) none of the species on the initial entrance channel have any important multi-reference character.
- (ii) **15** and **15/16a** possess a carbon atom that almost remains atomic in nature and the multi-reference electronic structure of these two species are originating from the carbon atom being very loosely bound to the system.
- (iii) Relative energies of reactants ( $C(^1D) + CH_3OH$ ) are much better computed by CCSD(T)/cc-pVTZ methodology than by different QDPT levels tested. This was indeed the case for  $C(^1D) + H_2O$  system.

We carried various CASSCF and CAS-MP2 calculations on species **1**, **15**, **1/2**, **1/3**, **1/4**, and **15/16a**. We here report the more balanced CAS(8,8)-MP2 results for all six species (Table S6) and CAS(12,11)-MP2 results for the OH insertion channel (Table S7). Due to the more number of active orbitals and electrons required to describe the methyl fragment (all C–H bonds had to be considered) we could not fit the chemistry of interest for all the six species to a single active space larger than 8,8. When compared to experimental data, CCSD(T) relative energies were much better ( $\sim 1$  kcal/mol error) than QDPT energies.

**Table S6.** Energies, Leading CI coefficients and Natural Orbital Occupation Numbers (NOON) of Critical Orbitals for the Initial Species on the Singlet PES

| Species         | QDPT- $i^a$                        |                                    | CCSD(T) $^b$                       |       | Exp.     |              | NOON $^d$    |              |
|-----------------|------------------------------------|------------------------------------|------------------------------------|-------|----------|--------------|--------------|--------------|
|                 | $E_{\text{electronic}}(\text{AU})$ | $\Delta H_{\text{rel}}$ (kcal/mol) | $\Delta H_{\text{rel}}$ (kcal/mol) |       | $c_{CI}$ |              |              |              |
| $C(^1D) + MeOH$ | -153.043349                        | 183.6                              | 191.0                              | 192.0 | 0.68     | -0.68        | 1.00         | 1.00         |
| <b>1</b>        | -153.064490                        | 171.3                              | 171.3                              | n/a   | 0.98     | <sup>c</sup> | <sup>e</sup> | <sup>f</sup> |
| <b>15</b>       | -153.057193                        | 175.7                              | 186.3                              | n/a   | 0.79     | -0.58        | 1.30         | 0.70         |
| <b>1/2</b>      | -153.059031                        | 173.3                              | 169.8                              | n/a   | 0.98     | <sup>c</sup> | <sup>e</sup> | <sup>f</sup> |
| <b>1/3</b>      | -153.054680                        | 173.9                              | 169.2                              | n/a   | 0.98     | <sup>c</sup> | <sup>e</sup> | <sup>f</sup> |
| <b>1/4</b>      | -153.050640                        | 177.8                              | 177.0                              | n/a   | 0.98     | <sup>c</sup> | <sup>e</sup> | <sup>f</sup> |
| <b>15/16a</b>   | -153.055205                        | 175.9                              | 189.3                              | n/a   | 0.73     | -0.66        | 1.09         | 0.91         |

<sup>a</sup>MCQDPT2/6-31G(d,p)//CAS(8,8)/6-31G(d,p), <sup>b</sup>cc-pVTZ/cc-pVTZ as reported in the discussion, <sup>c</sup>smaller than 0.1, <sup>d</sup>only the two MOs reported here are noteworthy as rest are all either doubly occupied ( $> 1.9$ ) or unoccupied ( $< 0.1$ ), <sup>e</sup> $> 1.9$  <sup>f</sup> $< 0.1$ .

**Table S7.** Comparison of Relative CCSD(T) Energies with QDPT Method Employing 8,8 and 12,11 Active Spaces in the CASSCF Reference

| Species             | QDPT-i <sup>a</sup>                | QDPT-j <sup>b</sup> | CCSD(T) <sup>c</sup> | Exp.  |
|---------------------|------------------------------------|---------------------|----------------------|-------|
|                     | $\Delta H_{\text{rel}}$ (kcal/mol) |                     |                      |       |
| <b>C(1D) + MeOH</b> | 183.6                              | 199.7               | 191.0                | 192.0 |
| <b>1</b>            | 171.3                              | 171.3               | 171.3                |       |
| <b>15</b>           | 175.7                              | n/a                 | 186.3                |       |
| <b>1/2</b>          | 173.3                              | 176.0               | 169.8                |       |
| <b>1/3</b>          | 173.9                              | 172.1               | 169.2                |       |
| <b>1/4</b>          | 177.8                              | 175.4               | 177.0                |       |
| <b>15/16a</b>       | 175.9                              | n/a                 | 189.3                |       |

<sup>a</sup>MCQDPT2/6-31G(d,p)//CAS(8,8)/6-31G(d,p), <sup>b</sup>MCQDPT2/6-31G(d,p)//CAS(12,11)/6-31G(d,p), <sup>c</sup>cc-pVTZ/cc-pVTZ as reported in the discussion.

All multi-reference calculations describe the early species on the OH-insertion channel with closed shell electronic structures. Particularly for complex **1** this result could be predicted by its tightly bound (C-O bond is 1.453 Å) structure. Consequently CCSD(T)/cc-pVTZ relative energies are reliable for the closed shell species **1**, **1/2**, **1/3**, and **1/4**.

For **15** and **15/16a** the MCSCF expansion is dominated by two large configurations which are originating from the two singly occupied carbon atom *p* orbitals at infinite distance. (Almost) Singly occupied Natural Orbitals of **15** and **15/16a** are graphically visible as carbon *p* atomic orbitals. Taking into account the structurally loose natures of **15** and **15/16a** two results are clear:

- (i) **15** and **15/16a** possess a loosely bound carbon atom that retains its atomic character (with two singly occupied *p* orbitals) which is the cause of the two large CI coefficients.
- (ii) CCSD(T)/cc-pVTZ energies will still be reliable because of fortuitous error cancellation due to the very similar electronic structure of the two species.

Thus we can safely believe that the errors in the CCSD(T) energies of **15** and **15/16a** should be nearly the same (and in the same direction) as that in an isolated C(<sup>1</sup>D) atom.

In addition, the reactivity scheme predicted by QDPT energies are qualitatively similar to those of CCSD(T), i.e. both CCSD(T) and QDPT computations predict that **1** and **15** can traverse their respective barriers to yield, **2**, **3**, **4**, and **16a** with low barriers. All these barriers are significantly lower than energy of the reactants. The only difference is in the prediction of existence of TSs **1/2** and **1/3** by QDPT, however this does not change the predictions on reaction products as QDPT barriers are very small. Moreover **1/2** and **1/3** do not need a multi-reference description as both are dominated by a single Slater determinant. Thus, based on CCSD(T) results these dissociation reactions are extremely facile. To better compute the barriers related with these two TSs we also performed CCSD(T)/6-311G(d,p) optimizations on **1**, **1/2**, and **1/3** and obtained essentially the same

result with CCSD optimizations. Both **1/2** and **1/3** are slightly (within a kcal/mol) over **1** on the electronic energy surface and lie below **1** after ZPVEs are added, hence dissociation products **2** and **3** are instantaneously generated on the attack of carbon to methanol.

**Table S8.** Representation of the Singlet and Triplet Species Investigated

| <b>Label</b> | <b>Species</b>                                   |
|--------------|--------------------------------------------------|
| <b>R(S)</b>  | C( <sup>1</sup> D)+MeOH                          |
| <b>R(T)</b>  | C( <sup>3</sup> P)+MeOH                          |
| <b>1</b>     | C--OHMe                                          |
| <b>1'</b>    | C--OHMe                                          |
| <b>2</b>     | COH+Me                                           |
| <b>3</b>     | COMe+H                                           |
| <b>4</b>     | Me-O-C-H                                         |
| <b>4'</b>    | cis-4                                            |
| <b>5</b>     | HCO+Me                                           |
| <b>6</b>     | MeCHO                                            |
| <b>7</b>     | MeCO+H                                           |
| <b>8</b>     | H <sub>2</sub> C=C=O+H <sub>2</sub>              |
| <b>9</b>     | CO+Me+H                                          |
| <b>10</b>    | H <sub>2</sub> C=O+CH <sub>2</sub>               |
| <b>11</b>    | CO+CH <sub>4</sub>                               |
| <b>12</b>    | CO+H <sub>2</sub> +CH <sub>2</sub>               |
| <b>13</b>    | H <sub>2</sub> C=CHOH                            |
| <b>14</b>    | H <sub>2</sub> O+C <sub>2</sub> H <sub>2</sub>   |
| <b>15</b>    | HO-CH <sub>2</sub> --H--C                        |
| <b>16</b>    | HO-CH <sub>2</sub> -C-H                          |
| <b>17</b>    | H <sub>2</sub> C-CH <sub>2</sub> -O              |
| <b>18</b>    | H <sub>2</sub> C-O-CH <sub>2</sub>               |
| <b>19</b>    | Me-C-OH                                          |
| <b>20</b>    | H <sub>2</sub> C-CHO+H                           |
| <b>21</b>    | H <sub>2</sub> C-C-OH+H                          |
| <b>22</b>    | HC-CHOH+H                                        |
| <b>23</b>    | H <sub>2</sub> C-OH+CH                           |
| <b>24</b>    | H <sub>2</sub> C-CH+OH                           |
| <b>25</b>    | MeO+CH                                           |
| <b>26</b>    | HC-O-CH <sub>2</sub> +H                          |
| <b>27</b>    | H <sub>2</sub> +HO-C=CH                          |
| <b>28</b>    | Me-C+OH                                          |
| <b>29</b>    | c-CH <sub>2</sub> CO+H <sub>2</sub>              |
| <b>30</b>    | CHCHO+H <sub>2</sub>                             |
| <b>31T</b>   | O( <sup>3</sup> P)+C <sub>2</sub> H <sub>4</sub> |



**Scheme S1.** Initial Exit Channels from **1** and **1'**

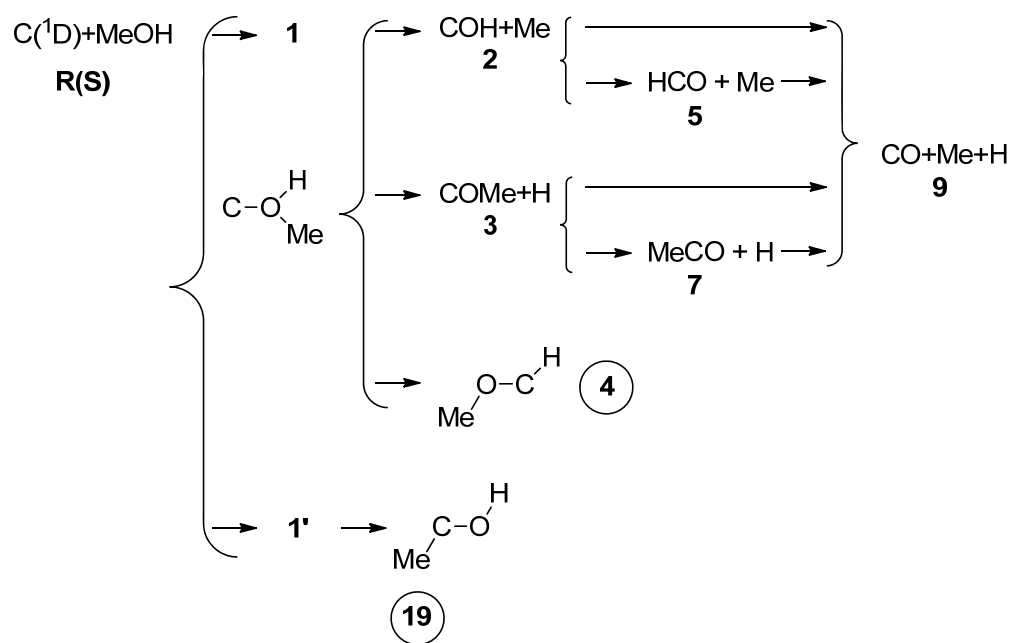

**Scheme S2.** Reaction Paths and Species on the Singlet PES

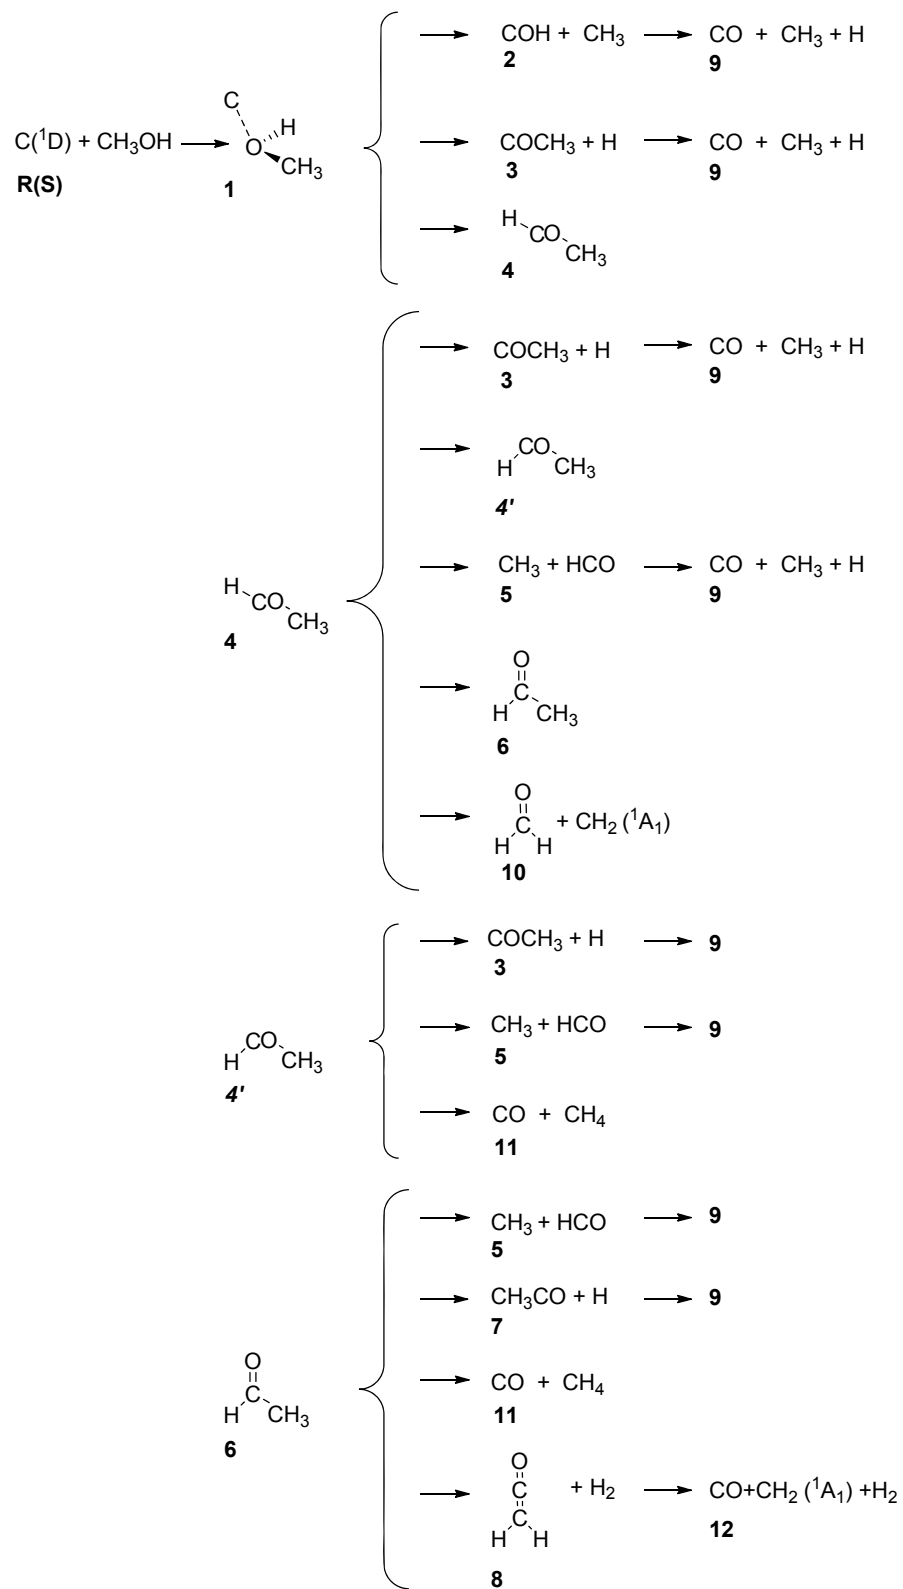

**Scheme S3.** Initial Exit Channels from **1T**

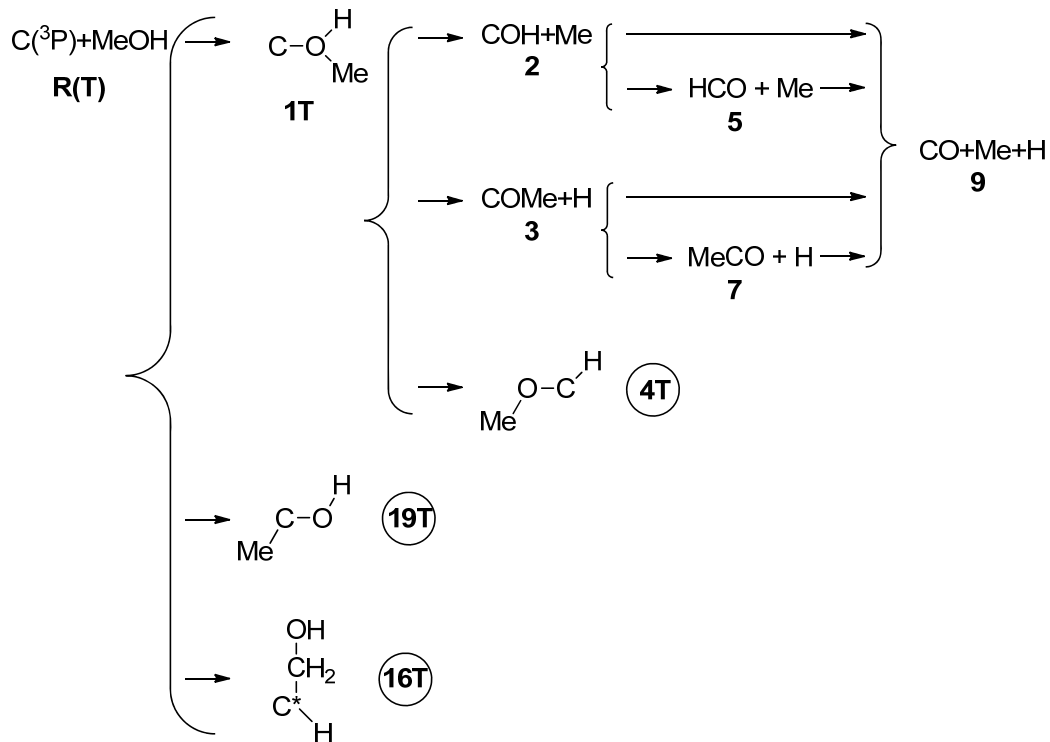

**Scheme S4.** Reaction Paths and Species on the Triplet PES

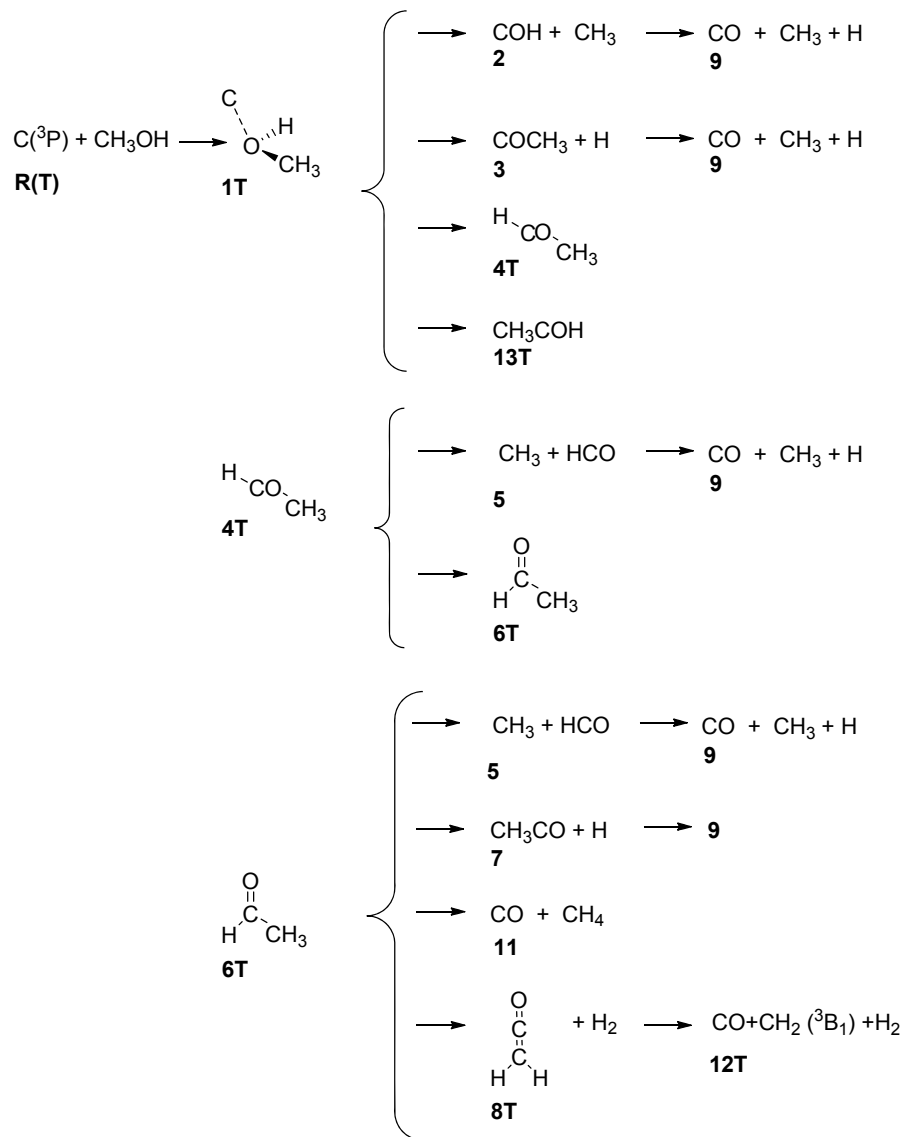

**Table S9.** Relative Enthalpies (kcal/mol) of C<sub>2</sub>H<sub>4</sub>O Isomers at 0K<sup>a</sup>

|               | CCSD(T)/<br>6-311G(d,p) | CCSD(T)/<br>cc-pVTZ | EXP <sup>b</sup>         |
|---------------|-------------------------|---------------------|--------------------------|
| <b>R(S)</b>   | 191.1                   | 191.0               | 192.0                    |
| <b>1</b>      | 177.9                   | 176.4               |                          |
| <b>2</b>      | 119.6                   | 121.6               |                          |
| <b>3</b>      | 139.4                   | 141.9               |                          |
| <b>4</b>      | 67.4                    | 67.1                |                          |
| <b>4'</b>     | 71.5                    | 70.6                |                          |
| <b>5</b>      | 78.0                    | 80.3                | 84.0                     |
| <b>6</b>      | 0.0                     | 0.0                 | 0.0                      |
| <b>7</b>      | 83.7                    | 86.6                |                          |
| <b>8</b>      | 25.2                    | 26.0                | 27.6                     |
| <b>9</b>      | 87.2                    | 93.3                | 98.5                     |
| <b>10</b>     | 111.5                   | 112.1               | 115.5                    |
| <b>11</b>     | -12.2                   | -8.3                | -4.8                     |
| <b>12</b>     | 103.6                   | 108.4               | 104.3                    |
| <b>13</b>     | 12.8                    | 10.5                | 10.2 <sup>c</sup> (298K) |
| <b>14</b>     | 39.1                    | 36.9                | 35.7                     |
| <b>1/2</b>    | 171.4                   | 169.8               |                          |
| <b>2/9</b>    | 124.6                   | 127.6               |                          |
| <b>1/3</b>    | 170.2                   | 169.2               |                          |
| <b>3/9</b>    | 139.2                   | 142.2               |                          |
| <b>1/4</b>    | 179.2                   | 177.0               |                          |
| <b>4/5</b>    | 85.8                    | 88.7                |                          |
| <b>4/6</b>    | 115.9                   | 114.0               |                          |
| <b>4/4'</b>   | 97.9                    | 96.6                |                          |
| <b>4'/5</b>   | 83.3 <sup>d</sup>       |                     |                          |
| <b>4'/11</b>  | 85.6                    | 87.6                |                          |
| <b>6/11</b>   | 82.8                    | 82.8                |                          |
| <b>6/8</b>    | 83.2                    | 81.2                |                          |
| <b>5/9</b>    | 93.0                    | 97.6                |                          |
| <b>7/9</b>    | 97.1                    | 101.6               |                          |
| <b>13/6</b>   | 69.3                    | 67.1                |                          |
| <b>13/14</b>  | 92.2                    | 89.6                |                          |
| <b>R(T)</b>   | 154.4                   | 157.4               | 162.8                    |
| <b>1T</b>     | 144.2                   | 146.1               |                          |
| <b>4T</b>     | 93.8                    | 94.1                |                          |
| <b>6T</b>     | 75.8                    | 76.9                |                          |
| <b>1T/2</b>   | 162.2                   | 162.6               |                          |
| <b>1T/3</b>   | 170.9                   | 171.4               |                          |
| <b>1T/4T</b>  | 158.7                   | 158.5               |                          |
| <b>1T/13T</b> | 179.1                   | 177.6               |                          |
| <b>4T/5</b>   | 107.3                   | 108.1               |                          |
| <b>4T/6T</b>  | 136.8                   | 135.6               |                          |
| <b>6T/5</b>   | 89.9                    | 90.6                |                          |
| <b>6T/7</b>   | 95.0                    | 96.3                |                          |

<sup>a</sup> All values are relative to CH<sub>3</sub>CHO (<sup>1</sup>A')

<sup>b</sup> Data taken from Computational Chemistry Comparison and Benchmark Database (CCCBDB) at <http://srdata.nist.gov/cccbdb/default.htm>.

<sup>c</sup> ΔH<sub>298</sub>

<sup>d</sup> Rel. to 4' at MCQDPT(2,2)/6-31G(d,p) level (optimization and frequency calculations) with active orbital (may be called HOMO & LUMO) occupancies of η<sub>12</sub> = 1.699 and η<sub>13</sub> = 0.301 respectively. RCCSD can not locate a TS, and departs the fragments as neutral methyl and formyl radicals.

**Table S10.** Relative 0K Enthalpies of the Singlet Minima at Various Theoretical Levels as Specified

| Label          | Species                                                            | Point group                                     | CCSD            | CCSD(T)         | CCSD    | CCSD(T) |
|----------------|--------------------------------------------------------------------|-------------------------------------------------|-----------------|-----------------|---------|---------|
|                |                                                                    |                                                 | 6-311G<br>(d,p) | 6-311G<br>(d,p) | cc-pVTZ | cc-pVTZ |
| <b>R(S)</b>    | C( <sup>1</sup> D)+MeOH                                            | C <sub>s</sub>                                  | 188.4           | 191.1           | 188.3   | 191.0   |
| <b>1</b>       | C--OHMe                                                            | C <sub>s</sub>                                  | 172.7           | 173.5           | 170.7   | 171.3   |
| <b>1'</b>      | C--OHMe                                                            | C <sub>1</sub>                                  | 177.3           | 177.9           | 175.8   | 176.4   |
| <b>2</b>       | COH+Me                                                             | C <sub>s</sub> +D <sub>3h</sub>                 | 116.8           | 119.6           | 118.5   | 121.6   |
| <b>3</b>       | COMe+H                                                             | C <sub>s</sub> , <sup>2</sup> A'                | 138.5           | 139.3           | 140.8   | 141.8   |
| <b>4</b>       | Me-O-C-H                                                           | C <sub>s</sub>                                  | 67.0            | 67.4            | 66.8    | 67.1    |
| <b>4'</b>      | cis-4                                                              | C <sub>s</sub>                                  | 71.4            | 71.5            | 70.5    | 70.6    |
| <b>5</b>       | HCO+Me                                                             | C <sub>s</sub> +D <sub>3h</sub>                 | 76.8            | 78.0            | 78.8    | 80.3    |
| <b>6 (Ref)</b> | MeCHO                                                              | C <sub>s</sub>                                  | 0.0             | 0.0             | 0.0     | 0.0     |
| <b>7</b>       | MeCO+H                                                             | C <sub>s</sub> , <sup>2</sup> A'                | 83.8            | 83.5            | 86.6    | 86.5    |
| <b>8</b>       | H <sub>2</sub> C=C=O+H <sub>2</sub>                                | C <sub>2v</sub>                                 | 26.7            | 25.2            | 27.4    | 26.0    |
| <b>9</b>       | CO+Me+H                                                            |                                                 | 86.1            | 87.1            | 91.7    | 93.2    |
| <b>10</b>      | H <sub>2</sub> C=O+CH <sub>2</sub> ( <sup>1</sup> A <sub>1</sub> ) | C <sub>2v</sub>                                 | 110.0           | 111.5           | 110.4   | 112.1   |
| <b>11</b>      | CO+CH <sub>4</sub>                                                 |                                                 | -12.4           | -12.2           | -8.9    | -8.3    |
| <b>12</b>      | CO+H <sub>2</sub> +CH <sub>2</sub>                                 | CH <sub>2</sub> ( <sup>1</sup> A <sub>1</sub> ) | 102.7           | 103.6           | 106.9   | 108.4   |
| <b>13</b>      | H <sub>2</sub> C=CHOH                                              | C <sub>s</sub>                                  | 12.8            | 12.9            | 10.7    | 10.5    |
| <b>14</b>      | H <sub>2</sub> O+C <sub>2</sub> H <sub>2</sub>                     |                                                 | 38.9            | 39.1            | 37.0    | 36.9    |
| <b>15</b>      | HO-CH <sub>2</sub> --H--C                                          | C <sub>1</sub>                                  | 187.9           | 187.5           | 186.6   | 186.3   |
| <b>16a</b>     | HO-CH <sub>2</sub> -C-H                                            | C <sub>s</sub>                                  | 91.2            | 92.7            | 88.8    | 90.2    |
| <b>16b</b>     | HO-CH <sub>2</sub> -C-H                                            | C <sub>1</sub>                                  | 95.5            | 95.5            | 93.7    | 93.3    |
| <b>17</b>      | H <sub>2</sub> C-CH <sub>2</sub> -O                                | C <sub>2v</sub>                                 | 30.1            | 30.2            | 28.1    | 28.1    |
| <b>19</b>      | Me-C-OH                                                            | C <sub>s</sub>                                  | 50.3            | 50.8            | 50.2    | 50.7    |
| <b>20</b>      | H <sub>2</sub> C-CHO+H                                             | C <sub>s</sub> , <sup>2</sup> A''               | 90.3            | 91.3            | 91.9    | 93.1    |
| <b>21</b>      | H <sub>2</sub> C-C-OH+H                                            | C <sub>1</sub> , <sup>2</sup> A                 | 116.3           | 116.7           | 117.1   | 117.5   |
| <b>22</b>      | HC-CHOH+H                                                          | C <sub>s</sub> , <sup>2</sup> A'                | 120.2           | 120.9           | 120.7   | 121.4   |
| <b>23</b>      | H <sub>2</sub> C-OH+CH                                             | C <sub>1</sub> , <sup>2</sup> A                 | 168.3           | 172.2           | 169.2   | 173.4   |
| <b>24</b>      | H <sub>2</sub> C-CH+OH                                             | C <sub>s</sub> , <sup>2</sup> A'                | 112.3           | 115.4           | 113.2   | 116.5   |
| <b>25</b>      | MeO+CH                                                             | C <sub>s</sub> , <sup>2</sup> A'                | 174.1           | 178.8           | 176.2   | 181.2   |
| <b>26</b>      | HC-O-CH <sub>2</sub> +H                                            | C <sub>s</sub> , <sup>2</sup> A''               | 162.2           | 163.1           | 163.8   | 164.8   |
| <b>27</b>      | H <sub>2</sub> +HO-C=CH                                            | C <sub>s</sub> , <sup>1</sup> A'                | 61.4            | 60.6            | 61.2    | 60.3    |

All the values are relative to singlet formaldehyde and in kcal/mol.

**Table S11.** Relative 0K Enthalpies of the Singlet TSs at Various Theoretical Levels as Specified

| Label   | Point group    | CCSD            | CCSD(T)         | CCSD    | CCSD(T) |
|---------|----------------|-----------------|-----------------|---------|---------|
|         |                | 6-311G<br>(d,p) | 6-311G<br>(d,p) | cc-pVTZ | cc-pVTZ |
| 1/19    |                | 196.0           | 193.6           | 193.4   | 190.7   |
| 1/2     |                | 172.7           | 171.4           | 171.2   | 169.8   |
| 1/3     |                | 172.4           | 170.2           | 171.4   | 169.2   |
| 1/4     |                | 179.9           | 179.2           | 178.0   | 177.0   |
| 2/9     |                | 123.4           | 124.6           | 126.2   | 127.6   |
| 3/9     | C <sub>s</sub> | 139.4           | 139.1           | 142.4   | 142.1   |
| 4/5     | C <sub>s</sub> | 107.0           | 85.8            | 109.6   | 88.7    |
| 4/4'    | C <sub>1</sub> | 96.8            | 97.9            | 95.6    | 96.6    |
| 4/6     | C <sub>1</sub> | 117.7           | 115.9           | 116.1   | 114.0   |
| 4/10    | C <sub>s</sub> | 116.6           | 114.3           | 116.3   | 113.7   |
| 4'/11   | C <sub>s</sub> | 102.4           | 85.6            | 104.4   | 87.6    |
| 5/9     |                | 92.4            | 93.0            | 96.5    | 97.5    |
| 6/8     | C <sub>1</sub> | 87.5            | 83.2            | 85.8    | 81.2    |
| 6/11    | C <sub>s</sub> | 86.6            | 82.8            | 86.9    | 82.8    |
| 6/13    | C <sub>1</sub> | 72.1            | 69.3            | 70.2    | 67.1    |
| 6/19    | C <sub>s</sub> | 82.8            | 80.4            | 81.6    | 79.1    |
| 13/14   |                | 94.5            | 92.2            | 92.4    | 89.7    |
| 7/9     |                | 97.4            | 97.0            | 101.7   | 101.5   |
| 15/16a  |                | 188.9           | 190.0           | 188.4   | 189.3   |
| 16a/16b |                | 97.9            | 99.3            | 96.4    | 97.7    |
| 16a/27  |                | 131.1           | 129.7           | 128.3   | 126.4   |
| 16b/17  |                | 100.5           | 98.1            | 98.9    | 96.1    |

All the values are relative to singlet formaldehyde and in kcal/mol.

**Table S12.** Relative 0K Enthalpies of the Triplet Minima<sup>a</sup>

| Label | Species                                                            | CCSD(T)         | CCSD(T) | EXP. <sup>b</sup> |
|-------|--------------------------------------------------------------------|-----------------|---------|-------------------|
|       |                                                                    | 6-311G<br>(d,p) | cc-pVTZ |                   |
| R(T)  | C( <sup>3</sup> P)+MeOH                                            | 154.4           | 157.4   | 162.8             |
| 1T    | C--OHMe                                                            | 144.2           | 146.1   |                   |
| 4T    | Me-O-C-H                                                           | 93.8            | 94.1    |                   |
| 6T    | MeCHO                                                              | 75.8            | 76.9    |                   |
| 10T   | H <sub>2</sub> C=O+CH <sub>2</sub> ( <sup>3</sup> B <sub>1</sub> ) | 99.4            | 102.2   |                   |
| 13T   | H <sub>2</sub> C=CHOH                                              | 77.3            | 76.6    |                   |
| 15T   | HO-CH <sub>2</sub> --H--C                                          | 154.8           | 158.9   |                   |
| 16T   | HO-CH <sub>2</sub> -C-H                                            | 88.7            | 89.0    |                   |
| 17T   | H <sub>2</sub> C-CH <sub>2</sub> -O                                | 84.6            | 85.2    |                   |
| 18T   | H <sub>2</sub> C-O-CH <sub>2</sub>                                 | 88.0            | 87.1    |                   |
| 19T   | Me-C-OH                                                            | 79.8            | 80.4    |                   |

<sup>a</sup> All the values are relative to singlet acetaldehyde and in kcal/mol.

<sup>b</sup> Data taken from Computational Chemistry Comparison and Benchmark Database (CCCBDB) at <http://srdata.nist.gov/cccbdb/default.htm>.

**Table S13.** Relative 0K Enthalpies of the Triplet TSs<sup>a</sup>

| Label          | CCSD(T)         | CCSD(T) |
|----------------|-----------------|---------|
|                | 6-311G<br>(d,p) | cc-pVTZ |
| <b>15T/16T</b> | 159.7           | 159.2   |
| <b>1T/19T</b>  | 179.1           | 177.7   |
| <b>1T/2</b>    | 162.2           | 162.6   |
| <b>1T/3</b>    | 171.1           | 171.5   |
| <b>1T/4T</b>   | 158.7           | 158.5   |
| <b>4T/5</b>    | 107.3           | 108.1   |
| <b>4T/6T</b>   | 136.8           | 135.6   |
| <b>4T/18T</b>  | 129.6           | 128.9   |
| <b>6T/5</b>    | 89.9            | 90.6    |
| <b>6T/7</b>    | 95.0            | 96.3    |
| <b>6T/13T</b>  | 110.5           | 109.6   |
| <b>6T/17T</b>  | 118.5           | 117.7   |
| <b>13T/19T</b> | 128.5           | 127.2   |
| <b>13T/16T</b> | 132.1           | 130.7   |
| <b>18T/10T</b> | 119.1           | 120.0   |
| <b>17T/10T</b> | 107.9           | 108.8   |

<sup>a</sup> All the values are relative to singlet acetaldehyde and in kcal/mol.



### Scheme S5. Reactions of 19

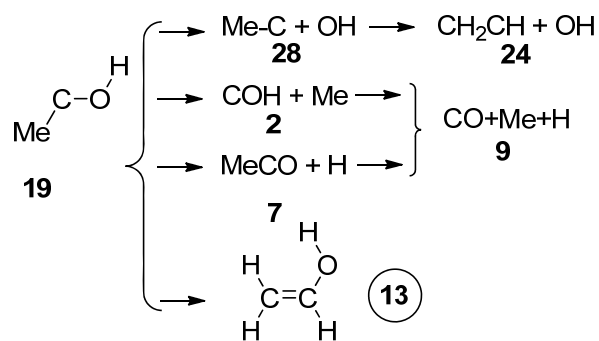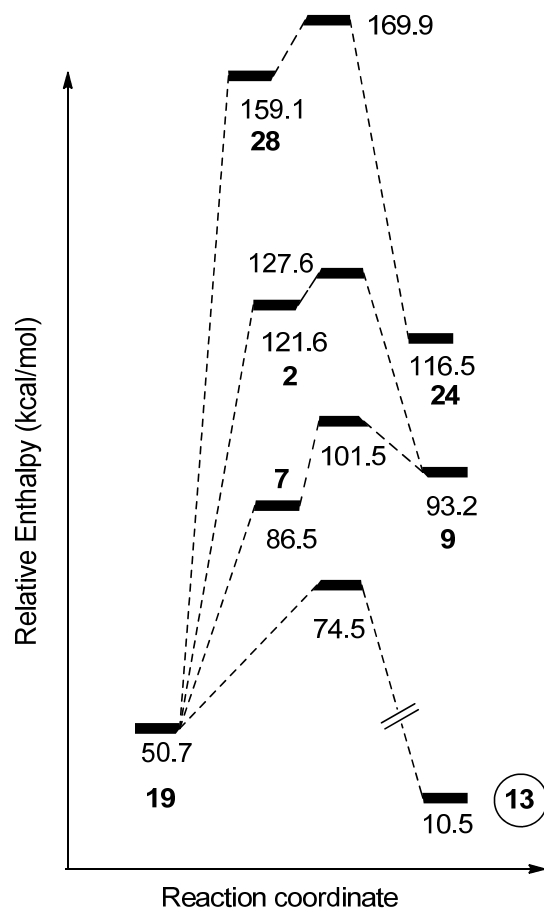

**Figure S1.** Relative 0K enthalpy ( $\Delta H_0$ ) profile for reactions of singlet carbene **19**. Energies are relative to acetaldehyde (species **6**) calculated at CCSD(T)/cc-pVTZ//CCSD/6-311g(d,p) level.

### Scheme S6. Reactions of 4

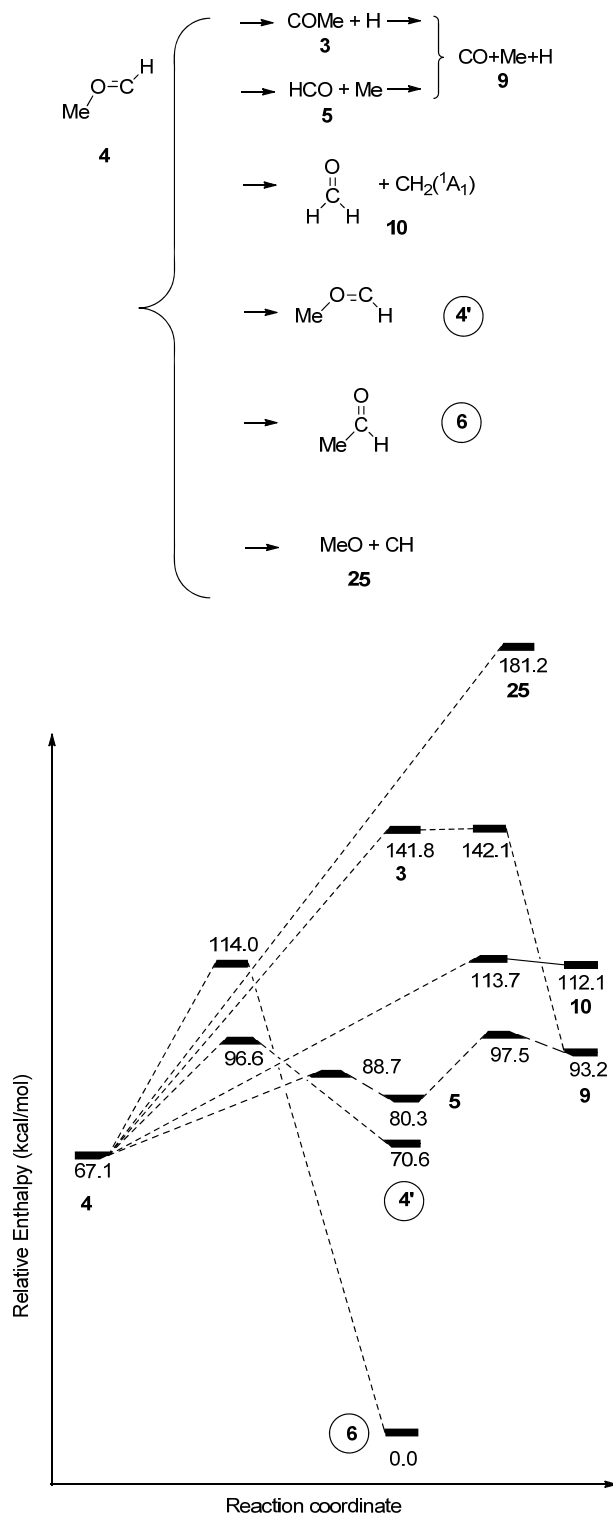

**Figure S2.** Relative 0K enthalpy ( $\Delta H_0$ ) profile for reactions of singlet trans-methoxycarbene **4**. Energies are relative to acetaldehyde (species **6**) calculated at CCSD(T)/cc-pVTZ//CCSD/6-311g(d,p) level.

**Scheme S7.** Reactions of **4'**

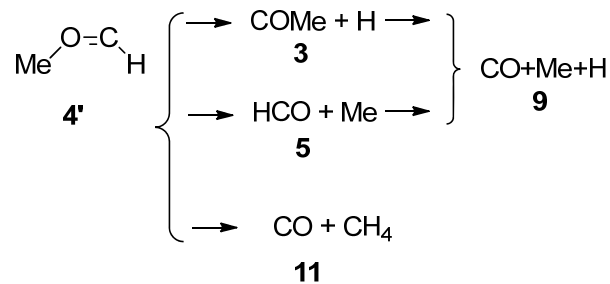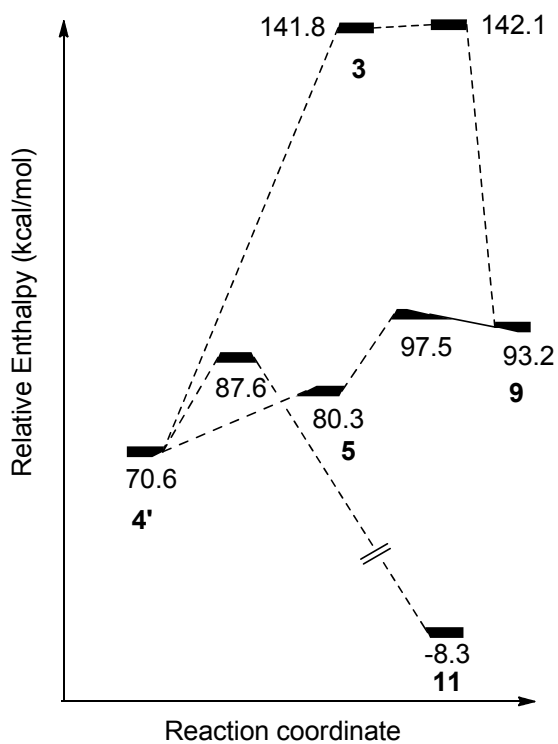

**Figure S3.** Relative 0K enthalpy ( $\Delta H_0$ ) profile for reactions of singlet carbene cis-methoxymethylene **4'**. Energies are relative to acetaldehyde (species **6**) calculated at CCSD(T)/cc-pVTZ//CCSD/6-311g(d,p) level.

**Scheme S8.** Reactions of **6**

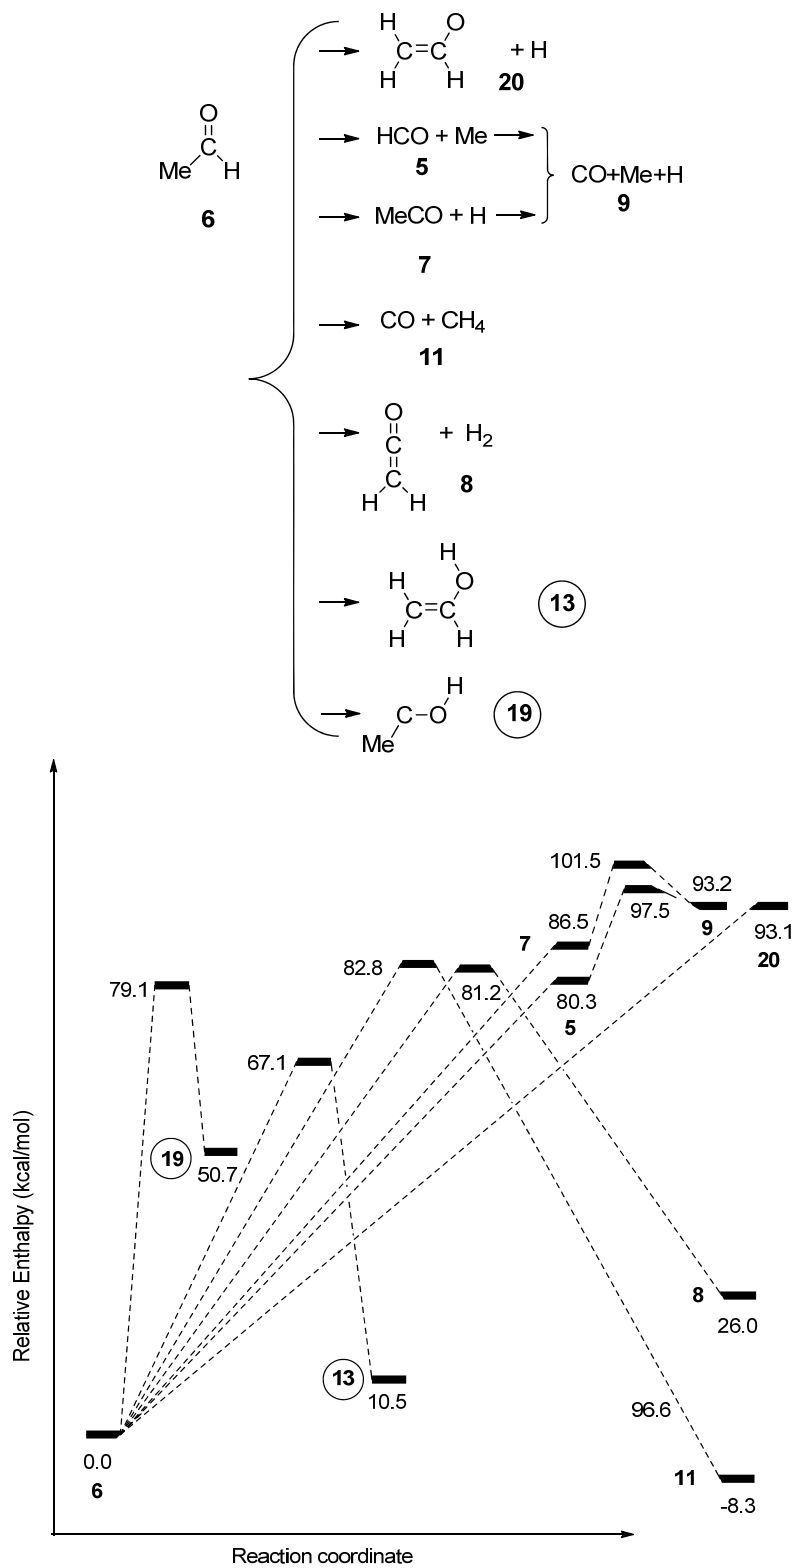

**Figure S4.** Relative 0K enthalpy ( $\Delta H_0$ ) profile for reactions of singlet acetaldehyde **6**. Energies are relative to acetaldehyde (species **6**) calculated at CCSD(T)/cc-pVTZ//CCSD/6-311g(d,p) level.

**Scheme S9.** Reactions of **13**

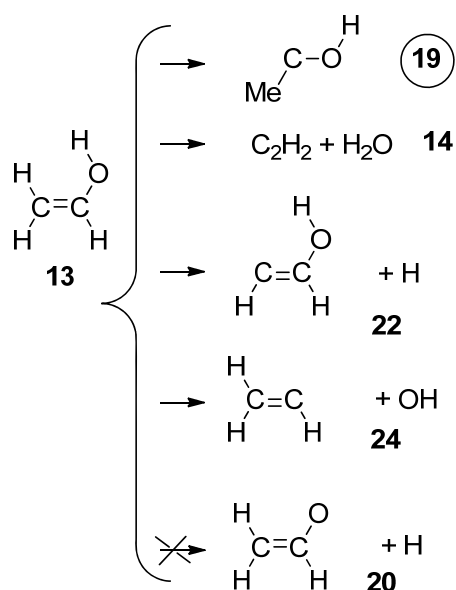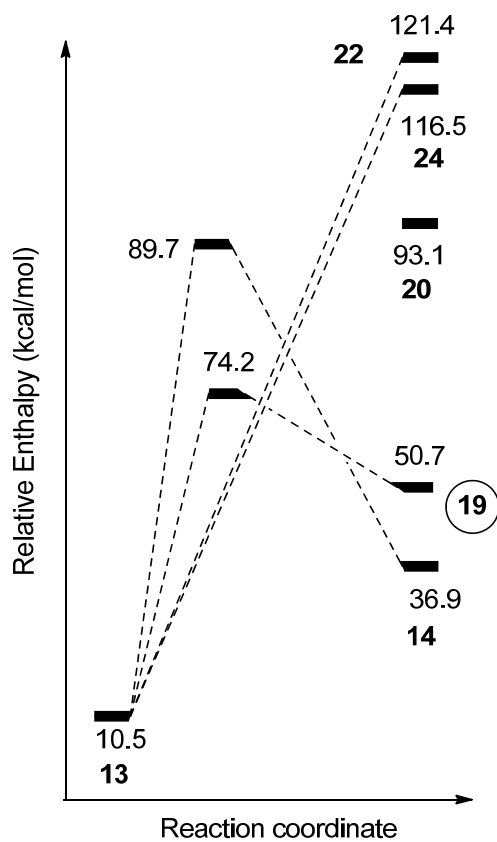

**Figure S5.** Relative 0K enthalpy ( $\Delta H_0$ ) profile for reactions of singlet vinyl alcohol (ethanol) **13**. Energies are relative to acetaldehyde (species **6**) calculated at CCSD(T)/cc-pVTZ//CCSD/6-311g(d,p) level.

### Scheme S10. Reactions of 4T

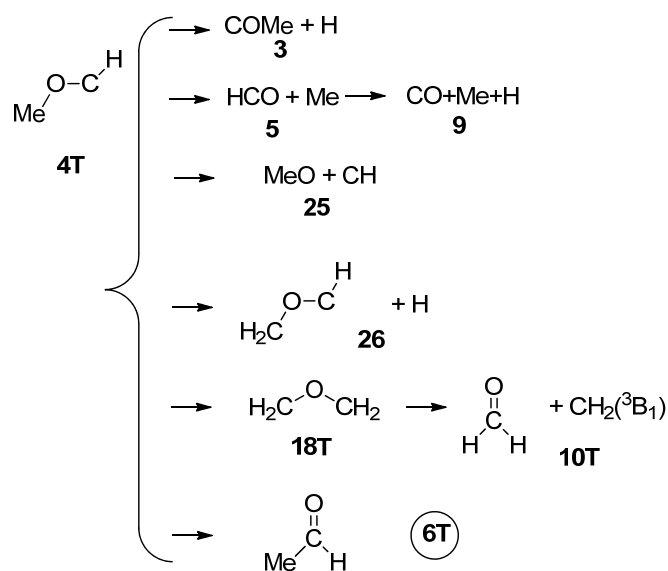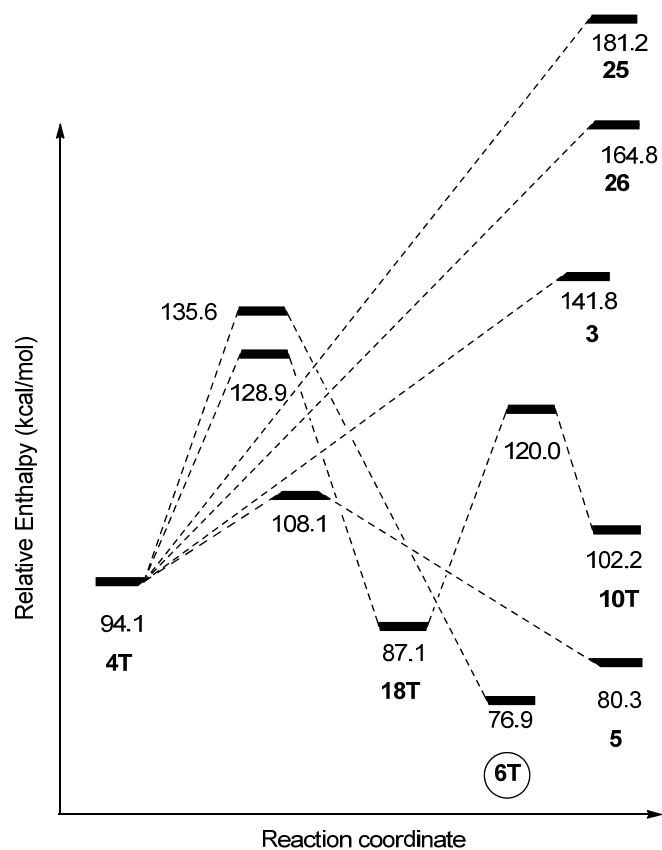

**Figure S6.** Relative 0K enthalpy ( $\Delta H_0$ ) profile for reactions of triplet methoxymethylene **4T**. Energies are relative to acetaldehyde (species **6**) calculated at CCSD(T)/cc-pVTZ//CCSD/6-311g(d,p) level.

**Scheme S11.** Reactions of **6T**

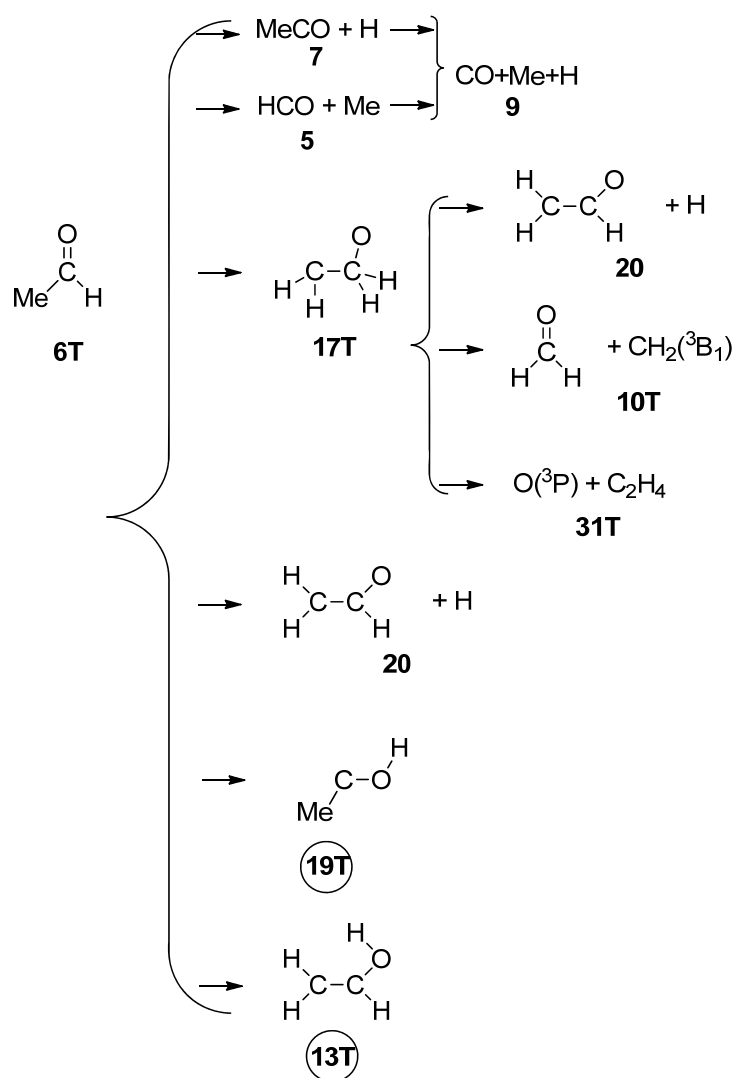

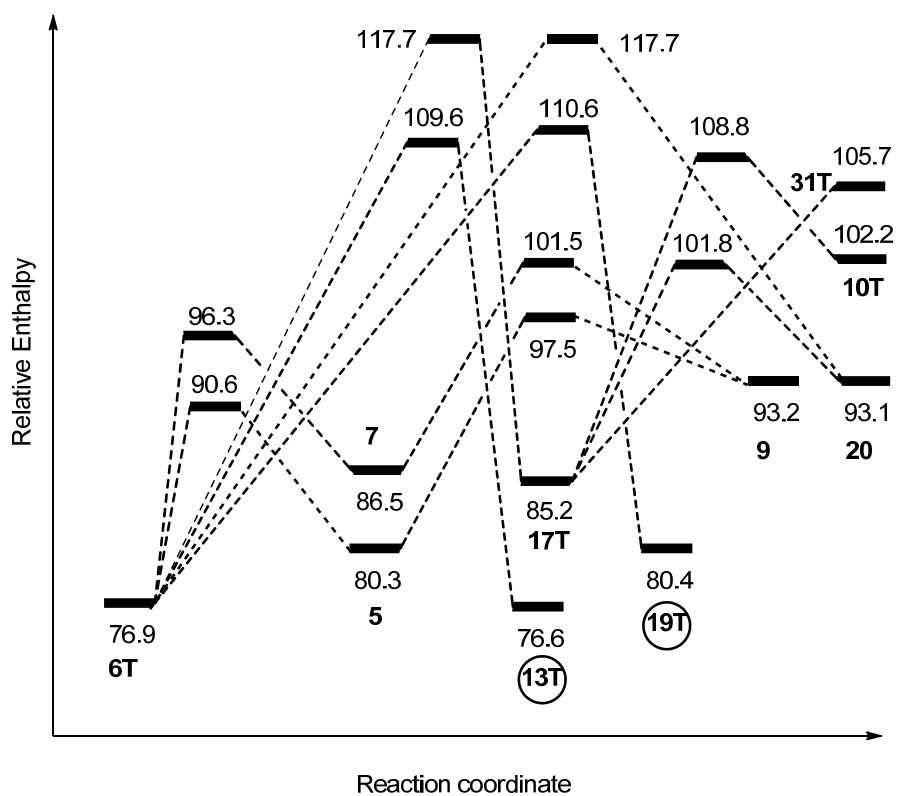

**Figure S7.** Relative 0K enthalpy ( $\Delta H_0$ ) profile for reactions of triplet acetaldehyde **6T**. Energies are relative to acetaldehyde (species **6**) calculated at CCSD(T)/cc-pVTZ//CCSD/6-311g(d,p) level.



### Scheme S12. Reactions of 13T

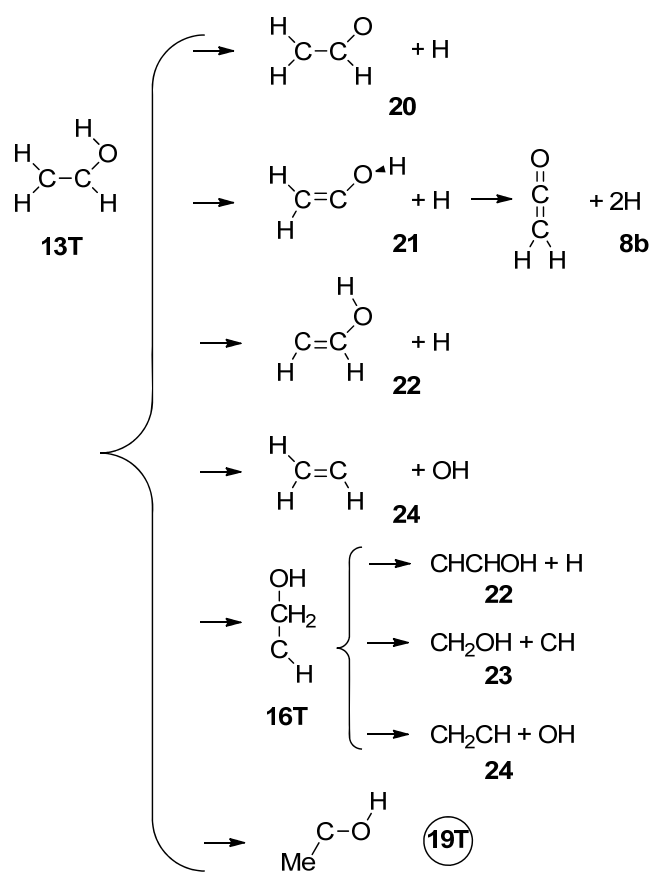

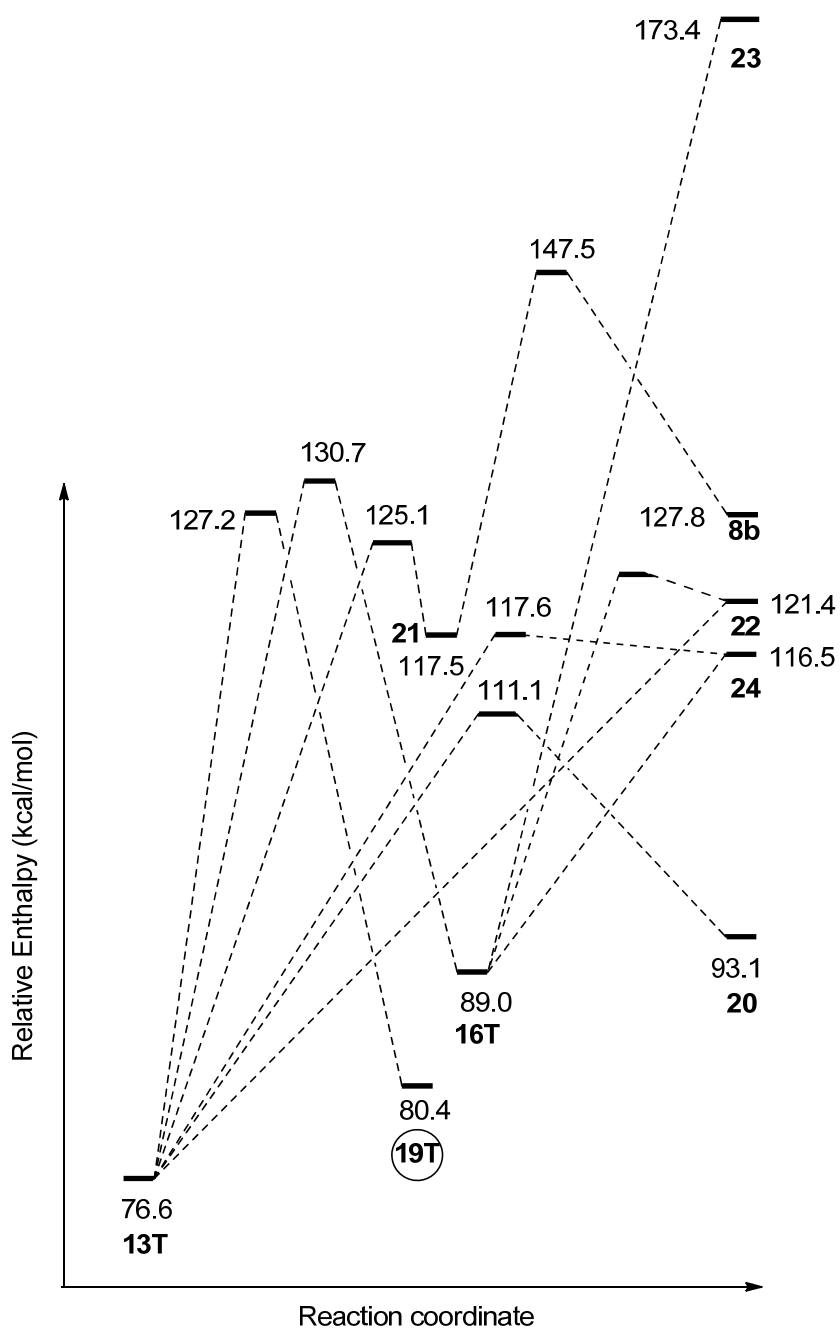

**Figure S8.** Relative 0K enthalpy ( $\Delta H_0$ ) profile for reactions of triplet  $\text{CH}_2\text{CHOH}$  **13T**. Energies are relative to acetaldehyde (species **6**) calculated at CCSD(T)/cc-pVTZ//CCSD/6-311g(d,p) level.

### Scheme S13. Reactions of **19T**

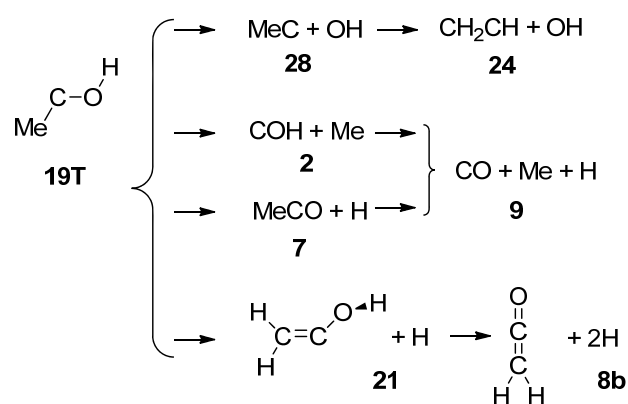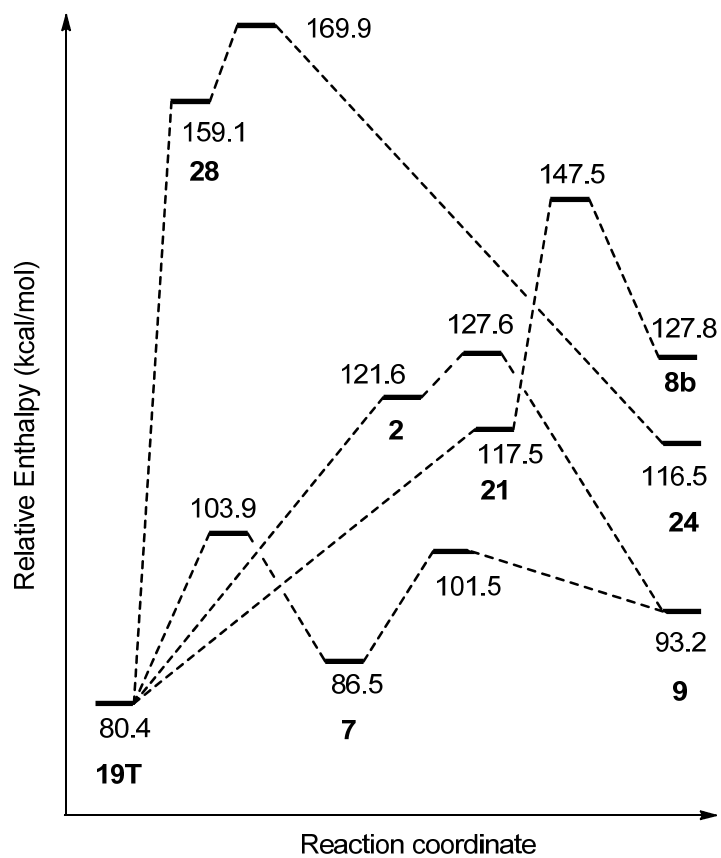

**Figure S9.** Relative 0K enthalpy ( $\Delta H_0$ ) profile for reactions of triplet O-C insertion carbene **19T**. Energies are relative to acetaldehyde (species **6**) calculated at CCSD(T)/cc-pVTZ//CCSD/6-311g(d,p) level.

**Scheme S14.** Formation of **13** on the Singlet C–H Insertion Path

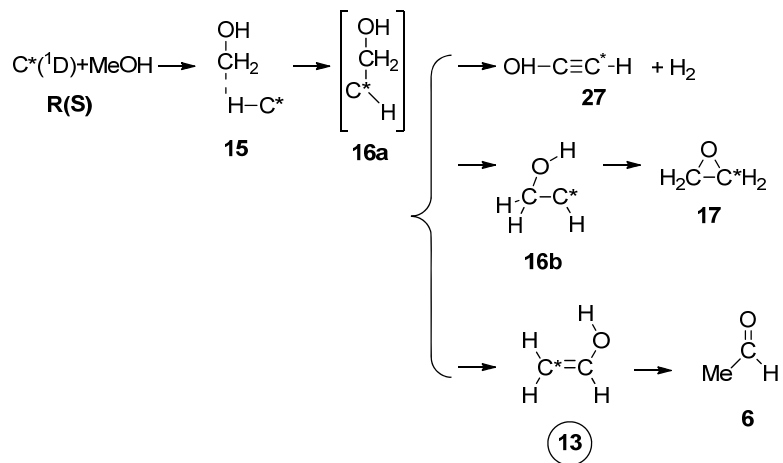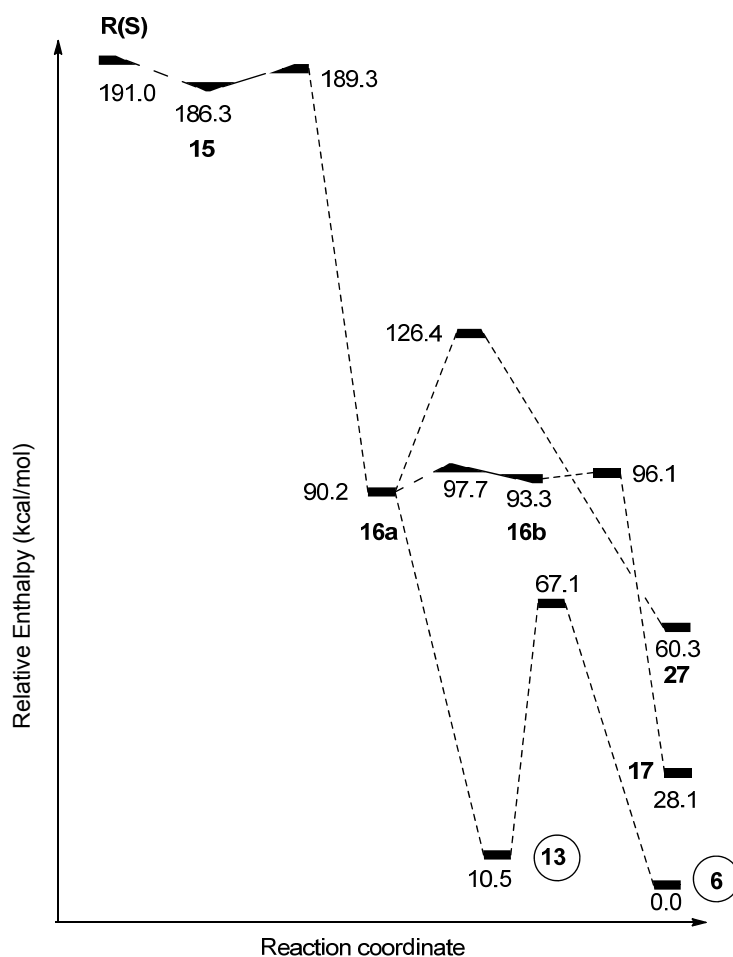

**Figure S10.** Relative 0K enthalpy ( $\Delta H_0$ ) profile for reactions of singlet C–H insertion complex **15**. Energies are relative to acetaldehyde (species **6**) calculated at CCSD(T)/cc-pVTZ//CCSD/6-311g(d,p) level.

**Scheme S15.** Exit Channels from Triplet C–H Insertion Product **15T**

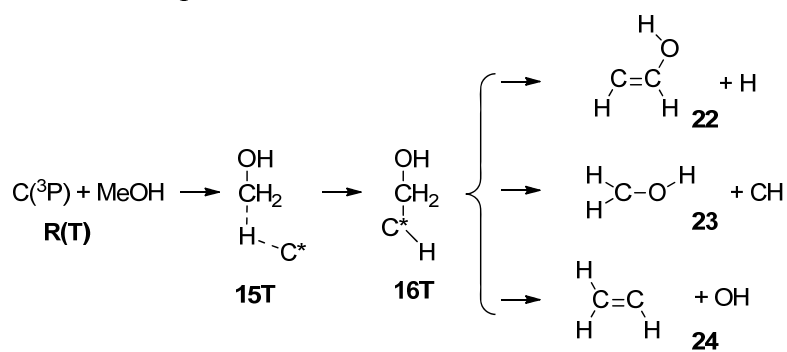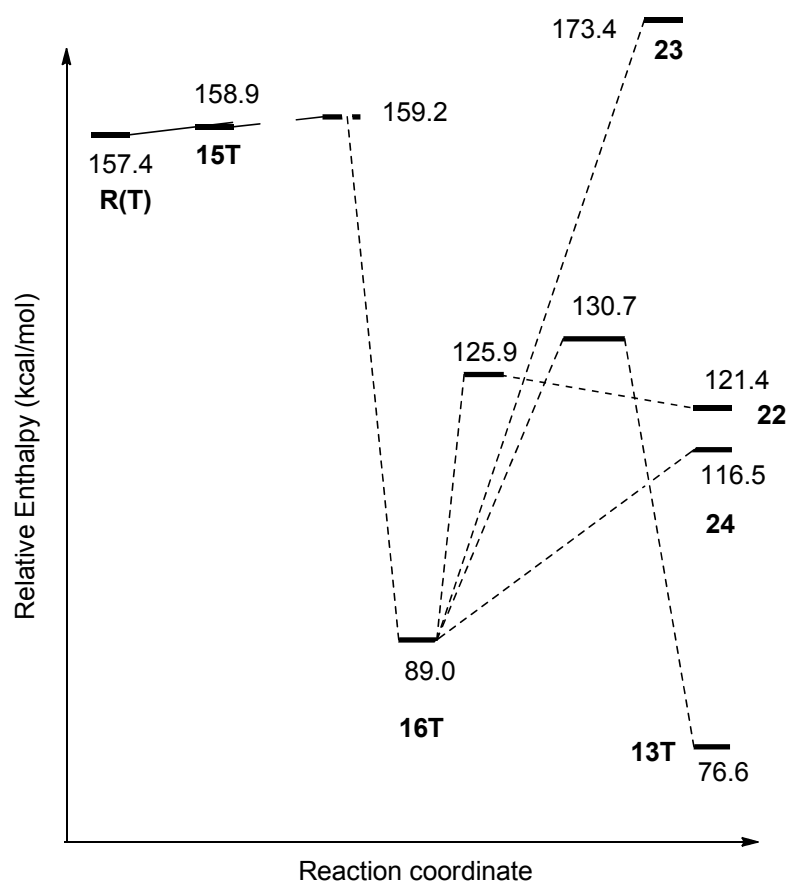

**Figure S11.** Relative 0K enthalpy ( $\Delta H_0$ ) profile for reactions of triplet C–H insertion complex **15T**. Energies are relative to acetaldehyde (species **6**) calculated at CCSD(T)/cc-pVTZ//CCSD/6-311g(d,p) level.

**Table S14.** Coupled Cluster Total Electronic Energies (Hartree) of Singlet Minima

| Label       | Species                                                            | E (AU)               | E (AU)                  | E (AU)           | E (AU)              |
|-------------|--------------------------------------------------------------------|----------------------|-------------------------|------------------|---------------------|
|             |                                                                    | CCSD/<br>6-311G(d,p) | CCSD(T)/<br>6-311G(d,p) | CCSD/<br>cc-pVTZ | CCSD(T)/<br>cc-pVTZ |
| <b>R(S)</b> | C( <sup>1</sup> D)+MeOH                                            | -153.162928          | -153.176785             | -153.258141      | -153.277931         |
| <b>1</b>    | C--OHMe                                                            | -153.189471          | -153.206336             | -153.287649      | -153.310801         |
| <b>1'</b>   | C--OHMe                                                            | -153.184040          | -153.201213             | -153.281350      | -153.304596         |
| <b>2</b>    | COH+Me                                                             | -153.268597          | -153.282366             | -153.360853      | -153.380105         |
| <b>3</b>    | COMe+H                                                             | -153.234004          | -153.250843             | -153.325227      | -153.347814         |
| <b>4</b>    | Me-O-C-H                                                           | -153.359950          | -153.377530             | -153.455299      | -153.478869         |
| <b>4'</b>   | cis-4                                                              | -153.352421          | -153.370355             | -153.448732      | -153.472724         |
| <b>5</b>    | HCO+Me                                                             | -153.331586          | -153.347813             | -153.423268      | -153.445003         |
| <b>6</b>    | MeCHO                                                              | -153.467139          | -153.485322             | -153.562130      | -153.586240         |
| <b>7</b>    | MeCO+H                                                             | -153.321090          | -153.339645             | -153.411554      | -153.435863         |
| <b>8</b>    | H <sub>2</sub> C=C=O+H <sub>2</sub>                                | -153.410368          | -153.431040             | -153.504262      | -153.530642         |
| <b>8b</b>   | H <sub>2</sub> C=C=O+2H                                            | -153.242027          | -153.262699             | -153.331926      | -153.358305         |
| <b>9</b>    | CO+Me+H                                                            | -153.308630          | -153.325155             | -153.394748      | -153.416449         |
| <b>10</b>   | H <sub>2</sub> C=O+CH <sub>2</sub> ( <sup>1</sup> A <sub>1</sub> ) | -153.279330          | -153.295212             | -153.373754      | -153.395169         |
| <b>11</b>   | CO+CH <sub>4</sub>                                                 | -153.481011          | -153.498766             | -153.570296      | -153.593565         |
| <b>12</b>   | CO+H <sub>2</sub> +CH <sub>2</sub>                                 | -153.279214          | -153.295969             | -153.367390      | -153.389190         |
| <b>13</b>   | H <sub>2</sub> C=CHOH                                              | -153.447671          | -153.465611             | -153.545924      | -153.570393         |
| <b>14</b>   | H <sub>2</sub> O+C <sub>2</sub> H <sub>2</sub>                     | -153.397495          | -153.415438             | -153.495632      | -153.519822         |
| <b>15</b>   | HO-CH <sub>2</sub> --H--C                                          | -153.165107          | -153.183815             | -153.262046      | -153.286603         |
| <b>16a</b>  | HO-CH <sub>2</sub> -C-H                                            | -153.317954          | -153.333706             | -153.416645      | -153.438568         |
| <b>16b</b>  | HO-CH <sub>2</sub> -C-H                                            | -153.314440          | -153.332671             | -153.412354      | -153.436965         |
| <b>17</b>   | H <sub>2</sub> C-CH <sub>2</sub> -O                                | -153.421373          | -153.439349             | -153.519415      | -153.543605         |
| <b>19</b>   | Me-C-OH                                                            | -153.386869          | -153.404156             | -153.481973      | -153.505277         |
| <b>20</b>   | H <sub>2</sub> C-CHO+H                                             | -153.309830          | -153.326330             | -153.402175      | -153.424473         |
| <b>21</b>   | H <sub>2</sub> C-C-OH+H                                            | -153.269297          | -153.286827             | -153.362910      | -153.386480         |
| <b>22</b>   | HC-CHOH+H                                                          | -153.263007          | -153.280067             | -153.357110      | -153.380193         |
| <b>23</b>   | H <sub>2</sub> C-OH+CH                                             | -153.187433          | -153.199371             | -153.280958      | -153.298381         |
| <b>24</b>   | H <sub>2</sub> C-CH+OH                                             | -153.277508          | -153.290839             | -153.371038      | -153.389889         |
| <b>25</b>   | MeO+CH                                                             | -153.177362          | -153.188134             | -153.269156      | -153.285154         |
| <b>26</b>   | HC-O-CH <sub>2</sub> +H                                            | -153.192970          | -153.209769             | -153.285348      | -153.307935         |
| <b>27</b>   | H <sub>2</sub> +HO-C=CH                                            | -153.355284          | -153.374845             | -153.450670      | -153.476263         |
| <b>28</b>   | Me-C+OH                                                            | -153.203568          | -153.214862             | -153.295880      | -153.312547         |
| <b>29</b>   | c-CH <sub>2</sub> CO+H <sub>2</sub>                                | -153.315249          | -153.335542             | -153.408770      | -153.434873         |
| <b>30</b>   | CHCHO+H <sub>2</sub>                                               | -153.280305          | -153.303282             | -153.375428      | -153.404009         |

**Table S15.** B3LYP Total Electronic Energies (Hartree) of Singlet Minima

| Label | Species                                                            | E (AU)            |
|-------|--------------------------------------------------------------------|-------------------|
|       |                                                                    | B3LYP/6-311G(d,p) |
| 2     | COH+Me                                                             | -153.673366       |
| 3     | COMe+H                                                             | -153.637311       |
| 4     | Me-O-C-H                                                           | -153.767885       |
| 4'    | cis-4                                                              | -153.761188       |
| 5     | HCO+Me                                                             | -153.740352       |
| 6     | MeCHO                                                              | -153.876861       |
| 7     | MeCO+H                                                             | -153.726772       |
| 8     | H <sub>2</sub> C=C=O+H <sub>2</sub>                                | -153.827324       |
| 9     | CO+Me+H                                                            | -153.699993       |
| 10    | H <sub>2</sub> C=O+CH <sub>2</sub> ( <sup>1</sup> A <sub>1</sub> ) | -153.680699       |
| 11    | CO+CH <sub>4</sub>                                                 | -153.879983       |
| 12    | CO+H <sub>2</sub> +CH <sub>2</sub>                                 | -153.670164       |
| 13    | H <sub>2</sub> C=CHOH                                              | -153.856733       |
| 14    | H <sub>2</sub> O+C <sub>2</sub> H <sub>2</sub>                     | -153.802146       |
| 16a   | HO-CH <sub>2</sub> -C-H                                            | -153.727844       |
| 16b   | HO-CH <sub>2</sub> -C-H                                            | -153.722981       |
| 17    | H <sub>2</sub> C-CH <sub>2</sub> -O                                | -153.830129       |
| 19    | Me-C-OH                                                            | -153.794391       |
| 20    | H <sub>2</sub> C-CHO+H                                             | -153.716865       |
| 21    | H <sub>2</sub> C-C-OH+H                                            | -153.676990       |
| 22    | HC-CHOH+H                                                          | -153.669026       |
| 23    | H <sub>2</sub> C-OH+CH                                             | -153.587579       |
| 24    | H <sub>2</sub> C-CH+OH                                             | -153.681560       |
| 25    | MeO+CH                                                             | -153.578098       |
| 26    | HC-O-CH <sub>2</sub> +H                                            | -153.598193       |
| 27    | H <sub>2</sub> +HO-C=CH                                            | -153.767053       |
| 28    | Me-C+OH                                                            | -153.604104       |
| 29    | c-CH <sub>2</sub> CO+H <sub>2</sub>                                | -153.721261       |
| 30    | CHCHO+H <sub>2</sub>                                               | -153.698791       |
| 8b    | H <sub>2</sub> C=C=O+2H                                            | -153.647753       |

**Table S16.** Coupled Cluster Total Electronic Energies (Hartree) of Triplet Minima

| Label       | Species                                                            | E (AU)               |                         | E (AU)           |                     |
|-------------|--------------------------------------------------------------------|----------------------|-------------------------|------------------|---------------------|
|             |                                                                    | CCSD/<br>6-311G(d,p) | CCSD(T)/<br>6-311G(d,p) | CCSD/<br>cc-pVTZ | CCSD(T)/<br>cc-pVTZ |
| <b>R(T)</b> | C( <sup>3</sup> P)+MeOH                                            | -153.224023          | -153.235298             | -153.314659      | -153.331487         |
| <b>1T</b>   | C--OHMe                                                            | -153.239589          | -153.253691             | -153.331323      | -153.351546         |
| <b>4T</b>   | Me-O-C-H                                                           | -153.318921          | -153.333763             | -153.413515      | -153.434265         |
| <b>6T</b>   | MeCHO                                                              | -153.347683          | -153.362150             | -153.441096      | -153.461314         |
| <b>10T</b>  | H <sub>2</sub> C=O+CH <sub>2</sub> ( <sup>3</sup> B <sub>1</sub> ) | -153.300575          | -153.315189             | -153.391669      | -153.411648         |
| <b>13T</b>  | H <sub>2</sub> C=CHOH                                              | -153.344593          | -153.359042             | -153.440684      | -153.461056         |
| <b>15T</b>  | HO-CH <sub>2</sub> --H--C                                          | -153.224825          | -153.236280             | -153.313601      | -153.330679         |
| <b>16T</b>  | HO-CH <sub>2</sub> -C-H                                            | -153.328488          | -153.342356             | -153.422960      | -153.442735         |
| <b>17T</b>  | H <sub>2</sub> C-CH <sub>2</sub> -O                                | -153.333025          | -153.346180             | -153.427335      | -153.446158         |
| <b>18T</b>  | H <sub>2</sub> C-O-CH <sub>2</sub>                                 | -153.326692          | -153.341417             | -153.423023      | -153.443644         |
| <b>19T</b>  | Me-C-OH                                                            | -153.341992          | -153.356547             | -153.436018      | -153.456492         |
| <b>31T</b>  | O( <sup>3</sup> P)+C <sub>2</sub> H <sub>4</sub>                   | -153.305131          | -153.318008             | -153.394853      | -153.412720         |

**Table S17.** B3LYP Total Electronic Energies (Hartree) of Triplet Minima

| Label       | Species                                                            | E (AU)            |
|-------------|--------------------------------------------------------------------|-------------------|
|             |                                                                    | B3LYP/6-311G(d,p) |
| <b>R(T)</b> | C( <sup>3</sup> P)+MeOH                                            | -153.613383       |
| <b>1T</b>   | C--OHMe                                                            | -153.640923       |
| <b>4T</b>   | Me-O-C-H                                                           | -153.727712       |
| <b>6T</b>   | MeCHO                                                              | -153.759860       |
| <b>10T</b>  | H <sub>2</sub> C=O+CH <sub>2</sub> ( <sup>3</sup> B <sub>1</sub> ) | -153.689827       |
| <b>13T</b>  | H <sub>2</sub> C=CHOH                                              | -153.755497       |
| <b>15T</b>  | HO-CH <sub>2</sub> --H--C                                          | -153.622721       |
| <b>16T</b>  | HO-CH <sub>2</sub> -C-H                                            | -153.727444       |
| <b>17T</b>  | H <sub>2</sub> C-CH <sub>2</sub> -O                                | -153.742958       |
| <b>18T</b>  | H <sub>2</sub> C-O-CH <sub>2</sub>                                 | -153.738603       |
| <b>19T</b>  | Me-C-OH                                                            | -153.749467       |
| <b>31T</b>  | O( <sup>3</sup> P)+C <sub>2</sub> H <sub>4</sub>                   | -153.699364       |



**Table S18.** Coupled Cluster Total Electronic Energies (Hartree) of Singlet TSs

| Label          | E (AU)<br>CCSD/<br>6-311G(d,p) | E (AU)<br>CCSD(T)/<br>6-311G(d,p) | E (AU)<br>CCSD/<br>cc-pVTZ | E (AU)<br>CCSD(T)/<br>cc-pVTZ |
|----------------|--------------------------------|-----------------------------------|----------------------------|-------------------------------|
| <b>1/19</b>    | -153.149100                    | -153.171115                       | -153.248250                | -153.276596                   |
| <b>1/2</b>     | -153.187191                    | -153.207362                       | -153.284468                | -153.310811                   |
| <b>1/3</b>     | -153.184294                    | -153.205893                       | -153.280817                | -153.308450                   |
| <b>1/4</b>     | -153.174556                    | -153.193911                       | -153.272562                | -153.298257                   |
| <b>2/9</b>     | -153.250589                    | -153.266881                       | -153.341111                | -153.363014                   |
| <b>3/9</b>     | -153.229268                    | -153.247999                       | -153.319445                | -153.344065                   |
| <b>4/5</b>     | -153.288299                    | -153.340353                       | -153.379143                | -153.436629                   |
| <b>4/4'</b>    | -153.309348                    | -153.325844                       | -153.406340                | -153.428888                   |
| <b>4/6</b>     | -153.275720                    | -153.296762                       | -153.373122                | -153.400628                   |
| <b>4/10</b>    | -153.275156                    | -153.296989                       | -153.370624                | -153.398764                   |
| <b>4'/11</b>   | -153.296384                    | -153.341345                       | -153.388250                | -153.438991                   |
| <b>5/9</b>     | -153.299437                    | -153.316575                       | -153.387809                | -153.410303                   |
| <b>6/8</b>     | -153.318660                    | -153.343666                       | -153.416407                | -153.447757                   |
| <b>6/11</b>    | -153.322641                    | -153.346911                       | -153.417226                | -153.447844                   |
| <b>6/13</b>    | -153.347005                    | -153.369737                       | -153.445019                | -153.474165                   |
| <b>6/19</b>    | -153.329154                    | -153.351128                       | -153.425947                | -153.454115                   |
| <b>13/14</b>   | -153.310857                    | -153.332699                       | -153.409078                | -153.437612                   |
| <b>7/9</b>     | -153.294687                    | -153.313424                       | -153.382796                | -153.407179                   |
| <b>15/16a</b>  | -153.161801                    | -153.178227                       | -153.257541                | -153.280175                   |
| <b>16a/16b</b> | -153.308648                    | -153.324589                       | -153.406067                | -153.428159                   |
| <b>16a/27</b>  | -153.249392                    | -153.269826                       | -153.348876                | -153.375949                   |
| <b>16b/17</b>  | -153.303203                    | -153.325188                       | -153.400847                | -153.429315                   |
| <b>28/24</b>   | -153.186468                    | -153.200640                       | -153.280205                | -153.299948                   |
| <b>21/8b</b>   | -153.208353                    | -153.229336                       | -153.301404                | -153.328551                   |

**Table S19.** B3LYP Total Electronic Energies (Hartree) of Singlet TSs

| <b>Label</b>   | <b>E (AU)<br/>B3LYP/6-311G(d,p)</b> |
|----------------|-------------------------------------|
| <b>1/3</b>     | -153.604981                         |
| <b>2/9</b>     | -153.662728                         |
| <b>3/9</b>     | -153.636823                         |
| <b>4/5</b>     | -153.725230                         |
| <b>4/4'</b>    | -153.718445                         |
| <b>4/6</b>     | -153.689872                         |
| <b>4/10</b>    | -153.690943                         |
| <b>4'/11</b>   | -153.712126                         |
| <b>4'/5</b>    | -153.733179                         |
| <b>5/9</b>     | -153.701058                         |
| <b>6/8</b>     | -153.743420                         |
| <b>6/11</b>    | -153.743272                         |
| <b>6/13</b>    | -153.765948                         |
| <b>6/19</b>    | -153.743328                         |
| <b>13/14</b>   | -153.727943                         |
| <b>7/9</b>     | -153.696238                         |
| <b>16a/16b</b> | -153.713697                         |
| <b>16a/27</b>  | -153.669980                         |
| <b>16b/17</b>  | -153.714694                         |
| <b>28/24</b>   | -153.591389                         |
| <b>21/8b</b>   | -153.630064                         |

**Table S20.** Coupled Cluster Total Electronic Energies (Hartree) of Triplet TSs

| Label          | E (AU)<br>CCSD/<br>6-311G(d,p) | E (AU)<br>CCSD(T)/<br>6-311G(d,p) | E (AU)<br>CCSD/<br>cc-pVTZ | E (AU)<br>CCSD(T)/<br>cc-pVTZ |
|----------------|--------------------------------|-----------------------------------|----------------------------|-------------------------------|
| <b>15T/16T</b> | -153.207121                    | -153.224372                       | -153.302428                | -153.326036                   |
| <b>1T/19T</b>  | -153.176344                    | -153.195441                       | -153.273000                | -153.298649                   |
| <b>1T/2</b>    | -153.203223                    | -153.221418                       | -153.297103                | -153.321709                   |
| <b>1T/3</b>    | -153.185039                    | -153.203851                       | -153.278935                | -153.304046                   |
| <b>1T/4T</b>   | -153.207163                    | -153.225628                       | -153.301974                | -153.326828                   |
| <b>4T/5</b>    | -153.289502                    | -153.307455                       | -153.382996                | -153.407208                   |
| <b>4T/6T</b>   | -153.243711                    | -153.262304                       | -153.340249                | -153.365196                   |
| <b>4T/18T</b>  | -153.253789                    | -153.271094                       | -153.349524                | -153.373052                   |
| <b>6T/5</b>    | -153.316959                    | -153.334962                       | -153.410691                | -153.434765                   |
| <b>6T/7</b>    | -153.305027                    | -153.323870                       | -153.397752                | -153.422633                   |
| <b>6T/13T</b>  | -153.283845                    | -153.301938                       | -153.379933                | -153.404357                   |
| <b>6T/17T</b>  | -153.270632                    | -153.288623                       | -153.366510                | -153.390801                   |
| <b>6T/19T</b>  | -153.284097                    | -153.301696                       | -153.379491                | -153.403296                   |
| <b>13T/19T</b> | -153.256460                    | -153.273435                       | -153.353256                | -153.376521                   |
| <b>13T/16T</b> | -153.250680                    | -153.267026                       | -153.347583                | -153.370168                   |
| <b>18T/10T</b> | -153.269993                    | -153.286391                       | -153.363366                | -153.385864                   |
| <b>17T/10T</b> | -153.289732                    | -153.305107                       | -153.383279                | -153.404526                   |
| <b>17T/20</b>  | -153.296631                    | -153.312434                       | -153.391151                | -153.412885                   |
| <b>13T/20</b>  | -153.277311                    | -153.295997                       | -153.372794                | -153.397679                   |
| <b>13T/21</b>  | -153.255719                    | -153.274165                       | -153.351110                | -153.375636                   |
| <b>13T/24</b>  | -153.272981                    | -153.289837                       | -153.368586                | -153.391614                   |
| <b>19T/7</b>   | -153.292933                    | -153.311208                       | -153.385964                | -153.410428                   |
| <b>16T/22</b>  | -153.256238                    | -153.273207                       | -153.351698                | -153.374774                   |

**Table S21.** B3LYP Total Electronic Energies (Hartree) of Triplet TSs

| <b>Label</b>   | <b>E (AU)<br/>B3LYP/6-311G(d,p)</b> |
|----------------|-------------------------------------|
| <b>15T/16T</b> | -153.617471                         |
| <b>1T/19T</b>  | -153.592482                         |
| <b>1T/2</b>    | -153.621172                         |
| <b>1T/3</b>    | -153.604213                         |
| <b>1T/4T</b>   | -153.617975                         |
| <b>4T/5</b>    | -153.709839                         |
| <b>4T/6T</b>   | -153.660243                         |
| <b>4T/18T</b>  | -153.667597                         |
| <b>6T/5</b>    | -153.734674                         |
| <b>6T/7</b>    | -153.720394                         |
| <b>6T/13T</b>  | -153.701778                         |
| <b>6T/17T</b>  | -153.692126                         |
| <b>6T/20</b>   | -153.691058                         |
| <b>6T/19T</b>  | -153.698396                         |
| <b>13T/19T</b> | -153.672513                         |
| <b>13T/16T</b> | -153.664698                         |
| <b>18T/10T</b> | -153.685823                         |
| <b>17T/10T</b> | -153.698519                         |
| <b>17T/20</b>  | -153.711699                         |
| <b>13T/20</b>  | -153.699055                         |
| <b>13T/21</b>  | -153.671869                         |
| <b>13T/24</b>  | -153.689901                         |
| <b>19T/7</b>   | -153.712445                         |
| <b>16T/22</b>  | -153.669376                         |

## CCSD/6-311G(d,p) OPTIMIZED GEOMETRIES AND CARTESIAN COORDINATES

The structures below are given in the order:

- 1) Minima on the singlet PES
- 2) Transition structures on the singlet PES, magnitude of imaginary frequency included.
- 3) Minima on the triplet PES
- 4) Transition structures on the triplet PES, magnitude of imaginary frequency included.
- 5) Radicalic species located as minima

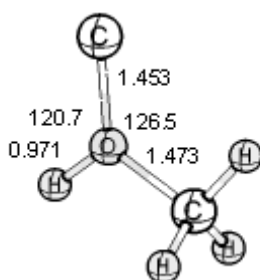

1

| Atomic Number | X            | Coordinates (Angstroms)<br>Y | Z            |
|---------------|--------------|------------------------------|--------------|
| 6             | 1.452648000  | 0.466130000                  | 0.000000000  |
| 8             | 0.000000000  | 0.441546000                  | 0.000000000  |
| 6             | -0.856651000 | -0.756650000                 | 0.000000000  |
| 1             | -0.510004000 | 1.267348000                  | 0.000000000  |
| 1             | -0.129260000 | -1.566016000                 | 0.000000000  |
| 1             | -1.468359000 | -0.745291000                 | 0.905384000  |
| 1             | -1.468359000 | -0.745291000                 | -0.905384000 |

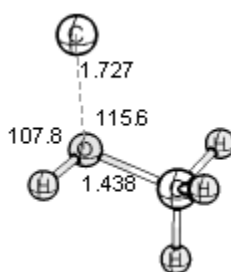

1'

| Atomic Number | X           | Coordinates (Angstroms)<br>Y | Z          |
|---------------|-------------|------------------------------|------------|
| 6             | 0.00000000  | 0.00000000                   | 0.00000000 |
| 8             | 0.00000000  | 0.00000000                   | 1.72747400 |
| 6             | 1.29695100  | 0.00000000                   | 2.34941700 |
| 1             | 1.18001200  | 0.00000000                   | 3.43495200 |
| 1             | 1.84765700  | 0.89146400                   | 2.04269700 |
| 1             | 1.88140000  | -0.74402900                  | 1.80453000 |
| 1             | -0.56615100 | 0.64099500                   | 2.16686700 |

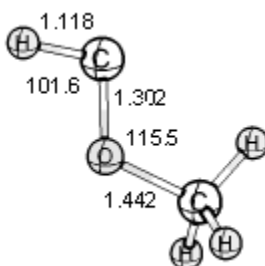

4

| Atomic Number | X            | Coordinates (Angstroms)<br>Y | Z            |
|---------------|--------------|------------------------------|--------------|
| 6             | 1.109984000  | 0.135101000                  | -0.000010000 |
| 8             | -0.206588000 | -0.454016000                 | 0.000010000  |
| 1             | 1.628054000  | -0.218170000                 | -0.894281000 |
| 1             | 1.009701000  | 1.221978000                  | -0.000575000 |
| 1             | 1.627683000  | -0.217232000                 | 0.894848000  |
| 6             | -1.198858000 | 0.389206000                  | 0.000007000  |
| 1             | -2.079492000 | -0.300291000                 | -0.000056000 |

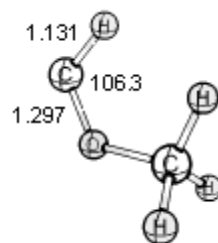

4'

| Atomic Number | Coordinates (Angstroms) |              |              |
|---------------|-------------------------|--------------|--------------|
|               | X                       | Y            | Z            |
| 6             | -1.081431000            | 0.160108000  | -0.000001000 |
| 8             | 0.205446000             | -0.503569000 | -0.000003000 |
| 1             | -1.619284000            | -0.160739000 | -0.894321000 |
| 1             | -1.618900000            | -0.159964000 | 0.894830000  |
| 1             | -0.931044000            | 1.244236000  | -0.000493000 |
| 6             | 1.326560000             | 0.149475000  | 0.000004000  |
| 1             | 1.054885000             | 1.247521000  | -0.000010000 |

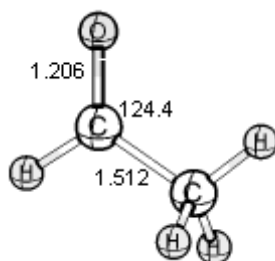

6

| Atomic Number | Coordinates (Angstroms) |              |              |
|---------------|-------------------------|--------------|--------------|
|               | X                       | Y            | Z            |
| 6             | 1.172178000             | -0.147392000 | -0.000009000 |
| 6             | -0.236976000            | 0.401097000  | -0.000049000 |
| 8             | -1.233305000            | -0.278861000 | 0.000011000  |
| 1             | 1.707620000             | 0.218437000  | 0.884575000  |
| 1             | 1.149447000             | -1.239306000 | -0.000741000 |
| 1             | 1.708292000             | 0.219697000  | -0.883652000 |
| 1             | -0.310130000            | 1.509830000  | 0.000084000  |

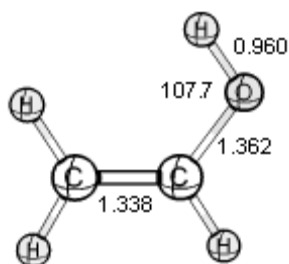

13

| Atomic Number | X            | Coordinates (Angstroms)<br>Y | Z            |
|---------------|--------------|------------------------------|--------------|
| 6             | -0.032563000 | 0.442810000                  | -0.000003000 |
| 8             | 1.209048000  | -0.118121000                 | -0.000018000 |
| 6             | -1.203096000 | -0.205148000                 | -0.000010000 |
| 1             | 0.034449000  | 1.526709000                  | 0.000039000  |
| 1             | -1.261852000 | -1.291055000                 | -0.000058000 |
| 1             | 1.099061000  | -1.071525000                 | 0.000170000  |
| 1             | -2.130088000 | 0.354863000                  | 0.000074000  |

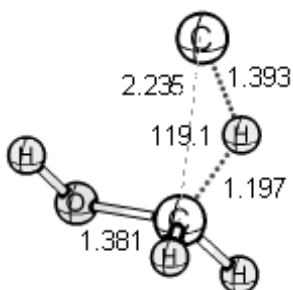

15

| Atomic Number | X            | Coordinates (Angstroms)<br>Y | Z            |
|---------------|--------------|------------------------------|--------------|
| 6             | -1.757004000 | -0.297513000                 | -0.021149000 |
| 8             | 1.037499000  | -0.492394000                 | -0.084283000 |
| 6             | 0.267447000  | 0.645905000                  | 0.052830000  |
| 1             | 0.625197000  | -1.168683000                 | 0.458928000  |
| 1             | -0.796192000 | 0.594304000                  | -0.493510000 |
| 1             | 0.100402000  | 0.983694000                  | 1.078567000  |
| 1             | 0.707946000  | 1.439488000                  | -0.559810000 |



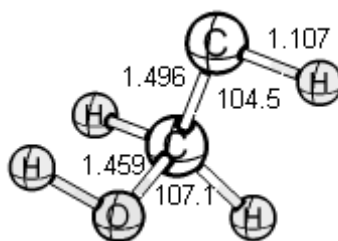

16a

| Atomic Number | Coordinates (Angstroms) |              |              |
|---------------|-------------------------|--------------|--------------|
|               | X                       | Y            | Z            |
| 1             | -1.308421000            | -0.712149000 | 0.841511000  |
| 6             | -0.089599000            | 0.730970000  | -0.008546000 |
| 8             | 0.849530000             | -0.377140000 | 0.131428000  |
| 6             | -1.008969000            | -0.435325000 | -0.187904000 |
| 1             | 0.129022000             | 1.354319000  | -0.877879000 |
| 1             | 1.024686000             | -0.703088000 | -0.756259000 |
| 1             | -0.050116000            | 1.304166000  | 0.919907000  |

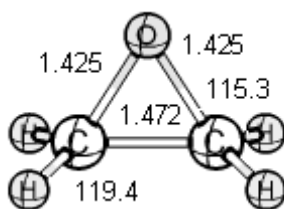

17

| Atomic Number | Coordinates (Angstroms) |              |              |
|---------------|-------------------------|--------------|--------------|
|               | X                       | Y            | Z            |
| 1             | -1.269826457            | -0.645070409 | -0.921945809 |
| 6             | 0.735735227             | -0.423079439 | 0.000000334  |
| 8             | 0.000036877             | 0.797388286  | -0.000000693 |
| 6             | -0.735778773            | -0.423036987 | -0.000000643 |
| 1             | 1.269785570             | -0.645202017 | 0.921932150  |
| 1             | -1.269830427            | -0.645070862 | 0.921948191  |
| 1             | 1.269804540             | -0.645220564 | -0.921919850 |

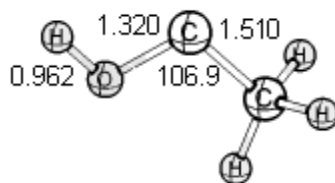

19

| Atomic Number | X            | Coordinates (Angstroms)<br>Y | Z            |
|---------------|--------------|------------------------------|--------------|
| 8             | 1.100922000  | 0.282119000                  | 0.000000000  |
| 6             | 0.137395000  | -0.619553000                 | -0.000001000 |
| 6             | -1.170171000 | 0.136226000                  | -0.000001000 |
| 1             | 1.933305000  | -0.199837000                 | -0.000001000 |
| 1             | -1.741742000 | -0.192876000                 | -0.877131000 |
| 1             | -1.060587000 | 1.228533000                  | -0.000037000 |
| 1             | -1.741693000 | -0.192818000                 | 0.877183000  |

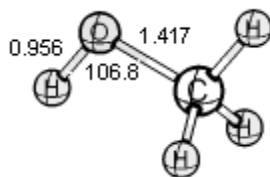

Methanol

| Atomic Number | X            | Coordinates (Angstroms)<br>Y | Z            |
|---------------|--------------|------------------------------|--------------|
| 6             | -0.046899000 | 0.659601000                  | 0.000000000  |
| 8             | -0.046899000 | -0.757167000                 | 0.000000000  |
| 1             | -1.091639000 | 0.979761000                  | 0.000000000  |
| 1             | 0.439751000  | 1.076887000                  | 0.893225000  |
| 1             | 0.439751000  | 1.076887000                  | -0.893225000 |
| 1             | 0.868719000  | -1.033799000                 | 0.000000000  |

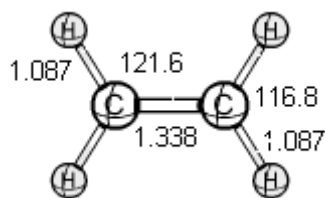

**Ethylene**

| Atomic Number | X           | Coordinates (Angstroms)<br>Y | Z            |
|---------------|-------------|------------------------------|--------------|
| 6             | 0.000000000 | 0.000000000                  | 0.668919000  |
| 6             | 0.000000000 | 0.000000000                  | -0.668919000 |
| 1             | 0.000000000 | 0.925721000                  | -1.238825000 |
| 1             | 0.000000000 | -0.925721000                 | -1.238825000 |
| 1             | 0.000000000 | -0.925721000                 | 1.238825000  |
| 1             | 0.000000000 | 0.925721000                  | 1.238825000  |

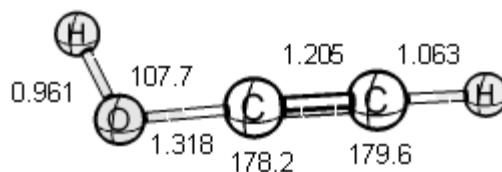

**CHCOH**

| Atomic Number | X            | Coordinates (Angstroms)<br>Y | Z           |
|---------------|--------------|------------------------------|-------------|
| 6             | 0.000000000  | 0.123891000                  | 0.000000000 |
| 6             | 0.233711000  | 1.306485000                  | 0.000000000 |
| 8             | -0.295718000 | -1.160438000                 | 0.000000000 |
| 1             | 0.432340000  | 2.351178000                  | 0.000000000 |
| 1             | 0.531139000  | -1.649929000                 | 0.000000000 |

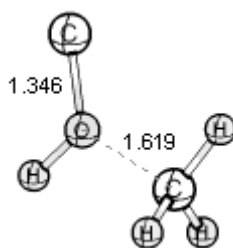

1/2

Im. Freq. (cm<sup>-1</sup>) = -706.2950

---

| Atomic Number | Coordinates (Angstroms) |              |              |
|---------------|-------------------------|--------------|--------------|
|               | X                       | Y            | Z            |
| 6             | -1.209192000            | -0.177900000 | -0.000027000 |
| 8             | 0.320559000             | 0.351430000  | 0.000095000  |
| 1             | -1.030751000            | -1.250579000 | -0.001777000 |
| 1             | -1.669711000            | 0.199263000  | 0.914535000  |
| 1             | 0.319620000             | 1.324450000  | -0.000284000 |
| 1             | -1.671124000            | 0.202134000  | -0.912740000 |
| 6             | 1.457107000             | -0.369885000 | -0.000054000 |

---

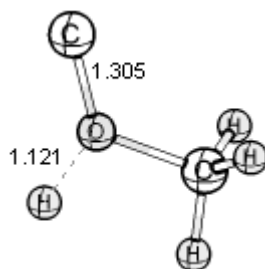

1/3

Im. Freq. (cm<sup>-1</sup>) = -1549.0497

---

| Atomic Number | Coordinates (Angstroms) |              |              |
|---------------|-------------------------|--------------|--------------|
|               | X                       | Y            | Z            |
| 6             | -1.092242000            | -0.196829000 | -0.000249000 |
| 1             | -1.737268000            | 0.691776000  | -0.039946000 |
| 1             | -1.208274000            | -0.762263000 | 0.922091000  |
| 1             | -1.179094000            | -0.828543000 | -0.881442000 |
| 8             | 0.283489000             | 0.349774000  | -0.000580000 |
| 6             | 1.376312000             | -0.363550000 | 0.000585000  |
| 1             | 0.152301000             | 1.463108000  | 0.001916000  |

---

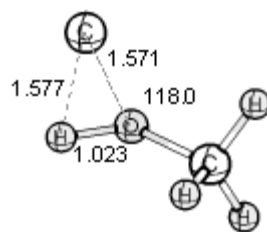

1/4

Im. Freq. (cm<sup>-1</sup>) = -1348.6686

---

| Atomic Number | X            | Coordinates (Angstroms)<br>Y | Z            |
|---------------|--------------|------------------------------|--------------|
| 6             | -1.470162000 | 0.392576000                  | 0.006740000  |
| 6             | 1.115714000  | 0.201207000                  | 0.029190000  |
| 8             | -0.163853000 | -0.470997000                 | -0.122943000 |
| 1             | 1.021076000  | 1.113621000                  | -0.562868000 |
| 1             | 1.281986000  | 0.444733000                  | 1.079887000  |
| 1             | -0.760359000 | -0.887008000                 | 0.595920000  |
| 1             | 1.894807000  | -0.466067000                 | -0.344976000 |

---

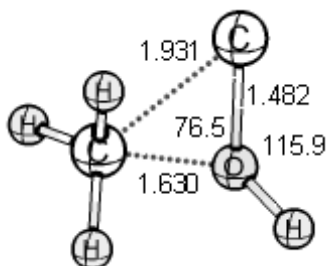

1'/19

Im. Freq. (cm<sup>-1</sup>) = -1182.1452

---

| Atomic Number | X            | Coordinates (Angstroms)<br>Y | Z            |
|---------------|--------------|------------------------------|--------------|
| 6             | -0.806920000 | 0.838411000                  | -0.022965000 |
| 8             | -0.498552000 | -0.602721000                 | 0.128608000  |
| 6             | 0.971916000  | 0.088235000                  | -0.001858000 |
| 1             | -0.791254000 | -1.191541000                 | -0.619190000 |
| 1             | 1.405599000  | 0.232321000                  | 0.979159000  |
| 1             | 0.963653000  | 0.969140000                  | -0.673271000 |
| 1             | 1.420439000  | -0.748030000                 | -0.566624000 |

---

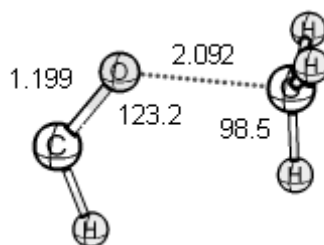

4/5

Im. Freq. (cm<sup>-1</sup>) = -397.4412

| Atomic Number | X            | Coordinates (Angstroms)<br>Y | Z            |
|---------------|--------------|------------------------------|--------------|
| 6             | -1.193358000 | 0.831901000                  | 0.000000000  |
| 8             | 0.000000000  | 0.717485000                  | 0.000000000  |
| 6             | 0.974206000  | -1.133297000                 | 0.000000000  |
| 1             | -1.840971000 | -0.082630000                 | 0.000000000  |
| 1             | 1.527645000  | -1.037699000                 | 0.924109000  |
| 1             | 1.527645000  | -1.037699000                 | -0.924109000 |
| 1             | 0.100593000  | -1.773471000                 | 0.000000000  |

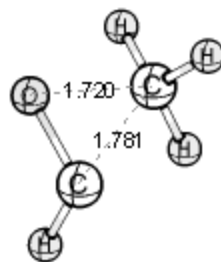

4/6

Im. Freq. (cm<sup>-1</sup>) = -1006.0802

| Atomic Number | X            | Coordinates (Angstroms)<br>Y | Z            |
|---------------|--------------|------------------------------|--------------|
| 8             | 0.556828000  | -0.681817000                 | -0.025495000 |
| 6             | 0.704457000  | 0.596858000                  | 0.192589000  |
| 1             | 1.128328000  | 1.088159000                  | -0.734563000 |
| 6             | -0.987644000 | 0.075247000                  | -0.002845000 |
| 1             | -1.333576000 | -0.729394000                 | -0.658954000 |
| 1             | -1.393283000 | 0.042746000                  | 0.999492000  |
| 1             | -1.156972000 | 1.020391000                  | -0.540486000 |

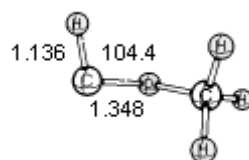

4/4'

Im. Freq. (cm<sup>-1</sup>) = -1063.3687

| Atomic Number | X            | Coordinates (Angstroms) |              | Z |
|---------------|--------------|-------------------------|--------------|---|
|               |              | Y                       |              |   |
| 6             | -1.076736000 | 0.180633000             | -0.008817000 |   |
| 8             | 0.171310000  | -0.503703000            | 0.057997000  |   |
| 1             | -1.197055000 | 0.665002000             | -0.984763000 |   |
| 1             | -1.846442000 | -0.577995000            | 0.128343000  |   |
| 1             | -1.154369000 | 0.932574000             | 0.788288000  |   |
| 6             | 1.279928000  | 0.220943000             | -0.194547000 |   |
| 1             | 1.608239000  | 0.600580000             | 0.824335000  |   |

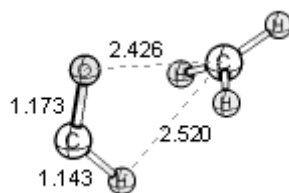

4'/11

Im. Freq. (cm<sup>-1</sup>) = -307.3105

| Atomic Number | X            | Coordinates (Angstroms) |              | Z |
|---------------|--------------|-------------------------|--------------|---|
|               |              | Y                       |              |   |
| 8             | 0.781705000  | -0.612450000            | 0.000000000  |   |
| 6             | -1.555342000 | 0.038786000             | 0.000000000  |   |
| 6             | 1.226763000  | 0.472829000             | 0.000000000  |   |
| 1             | -1.124118000 | 0.348756000             | -0.938979000 |   |
| 1             | -2.597165000 | -0.271478000            | 0.000000000  |   |
| 1             | -1.124118000 | 0.348756000             | 0.938979000  |   |
| 1             | 0.563234000  | 1.403880000             | 0.000000000  |   |

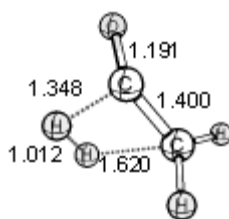

6/8

Im. Freq. (cm<sup>-1</sup>) = -1822.7559

---

| Atomic Number | X            | Coordinates (Angstroms)<br>Y | Z            |
|---------------|--------------|------------------------------|--------------|
| 6             | 1.182893000  | -0.224648000                 | 0.031844000  |
| 6             | -0.150423000 | 0.179575000                  | -0.108977000 |
| 8             | -1.273258000 | -0.195867000                 | 0.019084000  |
| 1             | 0.600811000  | 1.157602000                  | 0.643810000  |
| 1             | 1.432857000  | -1.275738000                 | 0.168538000  |
| 1             | 1.927880000  | 0.440284000                  | -0.391615000 |
| 1             | 0.029705000  | 1.515222000                  | -0.110611000 |

---

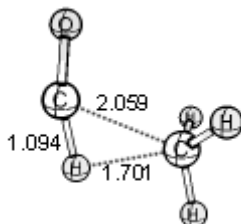

6/11

Im. Freq. (cm<sup>-1</sup>) = -1845.7965

---

| Atomic Number | X            | Coordinates (Angstroms)<br>Y | Z            |
|---------------|--------------|------------------------------|--------------|
| 6             | 1.379019000  | -0.144095000                 | 0.000000000  |
| 6             | -0.551785000 | 0.571461000                  | 0.000000000  |
| 8             | -1.278940000 | -0.345796000                 | 0.000000000  |
| 1             | 2.261875000  | 0.506625000                  | -0.000003000 |
| 1             | 1.332688000  | -0.754151000                 | 0.906054000  |
| 1             | 1.332684000  | -0.754155000                 | -0.906051000 |
| 1             | 0.340874000  | 1.203851000                  | 0.000000000  |

---



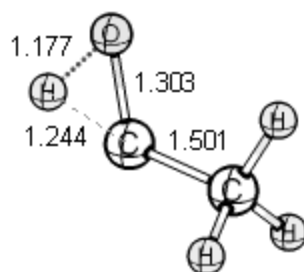

6/19

Im. Freq. (cm<sup>-1</sup>) = -2202.2363

| Atomic Number | X            | Coordinates (Angstroms)<br>Y | Z            |
|---------------|--------------|------------------------------|--------------|
| 1             | 1.028583000  | 1.234793000                  | 0.000000000  |
| 6             | -1.105472000 | -0.480373000                 | 0.000000000  |
| 6             | 0.000000000  | 0.534330000                  | 0.000000000  |
| 8             | 1.218823000  | 0.072887000                  | 0.000000000  |
| 1             | -1.735145000 | -0.325394000                 | 0.883624000  |
| 1             | -0.676049000 | -1.490845000                 | 0.000000000  |
| 1             | -1.735145000 | -0.325394000                 | -0.883624000 |

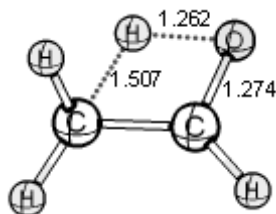

13/6

Im. Freq. (cm<sup>-1</sup>) = -2409.2859

| Atomic Number | X            | Coordinates (Angstroms)<br>Y | Z            |
|---------------|--------------|------------------------------|--------------|
| 6             | -0.117842000 | 0.534969000                  | 0.045047000  |
| 8             | -1.098873000 | -0.275484000                 | -0.021490000 |
| 6             | 1.108227000  | -0.184850000                 | -0.052051000 |
| 1             | -0.320751000 | 1.606050000                  | 0.131930000  |
| 1             | 1.284419000  | -0.772917000                 | 0.852338000  |
| 1             | -0.120755000 | -1.014644000                 | -0.320557000 |
| 1             | 2.005762000  | 0.284671000                  | -0.449760000 |

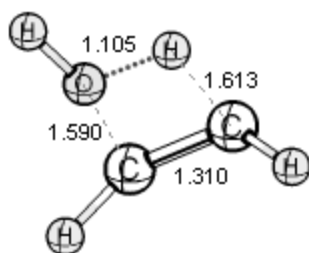

13/14

Im. Freq. (cm<sup>-1</sup>) = -1241.0954

| Atomic Number | X            | Y            | Z            |
|---------------|--------------|--------------|--------------|
| 1             | -2.209049000 | -0.239636000 | 0.044057000  |
| 6             | -0.280776000 | 0.589382000  | 0.001465000  |
| 8             | 1.110477000  | -0.173172000 | -0.102187000 |
| 6             | -1.134081000 | -0.403884000 | 0.020616000  |
| 1             | -0.090331000 | 1.653629000  | -0.034579000 |
| 1             | 1.539526000  | -0.153275000 | 0.764738000  |
| 1             | 0.365179000  | -0.988330000 | -0.089205000 |

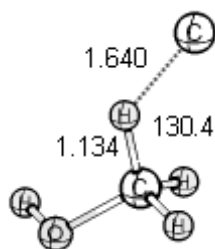

15/16a

| Atomic Number | X            | Y            | Z            |
|---------------|--------------|--------------|--------------|
| 1             | 0.628938000  | -0.382510000 | -0.048163000 |
| 6             | -0.184652000 | 0.401106000  | 0.055951000  |
| 8             | -1.425284000 | -0.230648000 | -0.127843000 |
| 6             | 2.261319000  | -0.228667000 | -0.028537000 |
| 1             | -0.076226000 | 0.884385000  | 1.034045000  |
| 1             | -1.552318000 | -0.831854000 | 0.606911000  |
| 1             | -0.058130000 | 1.140529000  | -0.734534000 |

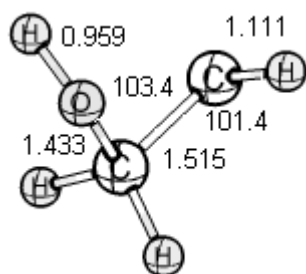

**16a/16b**

Im. Freq. (cm<sup>-1</sup>) = -468.0055

| Atomic Number | Coordinates (Angstroms) |              |              |
|---------------|-------------------------|--------------|--------------|
|               | X                       | Y            | Z            |
| 1             | -1.211903000            | -0.942554000 | 0.763133000  |
| 6             | -0.082443000            | 0.594626000  | 0.016039000  |
| 8             | 1.029985000             | -0.306121000 | 0.093843000  |
| 6             | -1.269564000            | -0.329530000 | -0.161683000 |
| 1             | 0.050858000             | 1.303160000  | -0.809727000 |
| 1             | 1.156164000             | -0.657462000 | -0.789622000 |
| 1             | -0.122960000            | 1.155245000  | 0.959338000  |

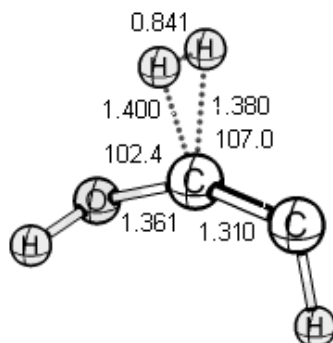

**16a/27**

Im. Freq. (cm<sup>-1</sup>) = -1356.1659

| Atomic Number | Coordinates (Angstroms) |              |              |
|---------------|-------------------------|--------------|--------------|
|               | X                       | Y            | Z            |
| 1             | 1.569249000             | -1.202272000 | -0.064999000 |
| 6             | 0.128497000             | 0.182793000  | -0.006834000 |
| 8             | -1.172108000            | -0.204022000 | -0.109829000 |
| 6             | 1.402661000             | -0.121420000 | 0.019100000  |
| 1             | 0.016174000             | 1.490898000  | 0.479478000  |
| 1             | -1.433849000            | -0.538655000 | 0.751303000  |
| 1             | 0.038342000             | 1.513965000  | -0.360746000 |

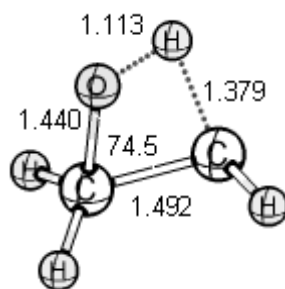

**16b/17**

Im. Freq. (cm<sup>-1</sup>) = -1354.6286

| Atomic Number | X            | Coordinates (Angstroms)<br>Y | Z            |
|---------------|--------------|------------------------------|--------------|
| 1             | -1.447869000 | -0.284502000                 | 0.848815000  |
| 6             | 0.206520000  | 0.738927000                  | -0.017076000 |
| 8             | 0.674469000  | -0.619078000                 | 0.087505000  |
| 6             | -1.010504000 | -0.114274000                 | -0.144894000 |
| 1             | 0.577580000  | 1.266282000                  | -0.895405000 |
| 1             | -0.092827000 | -1.035740000                 | -0.603355000 |
| 1             | 0.391270000  | 1.258669000                  | 0.921725000  |

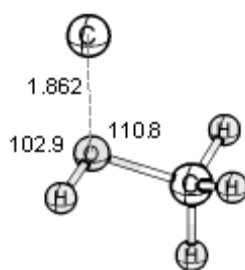

**1T**

| Atomic Number | Coordinates (Angstroms) |              |              |
|---------------|-------------------------|--------------|--------------|
|               | X                       | Y            | Z            |
| 6             | 1.654601000             | -0.373444000 | 0.025844000  |
| 6             | -1.070588000            | -0.310523000 | 0.024277000  |
| 8             | 0.055201000             | 0.567616000  | -0.131735000 |
| 1             | -1.032932000            | -1.001982000 | -0.816979000 |
| 1             | -0.999205000            | -0.871528000 | 0.960741000  |
| 1             | 0.083434000             | 1.165492000  | 0.620357000  |
| 1             | -1.996984000            | 0.270892000  | -0.010960000 |

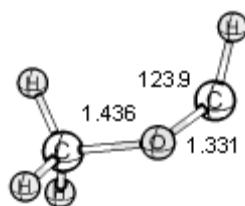

**4T**

| Atomic Number | Coordinates (Angstroms) |              |              |
|---------------|-------------------------|--------------|--------------|
|               | X                       | Y            | Z            |
| 6             | 1.079803000             | 0.195166000  | -0.000692000 |
| 8             | -0.162603000            | -0.523077000 | -0.047221000 |
| 1             | 1.224690000             | 0.641628000  | 0.988022000  |
| 1             | 1.864980000             | -0.536357000 | -0.198877000 |
| 1             | 1.095458000             | 0.978786000  | -0.766649000 |
| 6             | -1.249098000            | 0.216017000  | 0.165571000  |
| 1             | -1.868532000            | 0.633459000  | -0.634005000 |

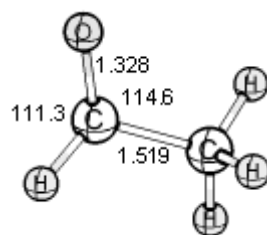

6T

| Atomic Number | X            | Coordinates (Angstroms)<br>Y | Z            |
|---------------|--------------|------------------------------|--------------|
| 6             | -1.157294000 | -0.162061000                 | 0.019123000  |
| 6             | 0.199890000  | 0.498873000                  | -0.145393000 |
| 8             | 1.235455000  | -0.313624000                 | 0.029265000  |
| 1             | -1.937354000 | 0.563562000                  | -0.226149000 |
| 1             | -1.247571000 | -1.015626000                 | -0.659782000 |
| 1             | -1.310443000 | -0.519633000                 | 1.047232000  |
| 1             | 0.356153000  | 1.459817000                  | 0.362202000  |

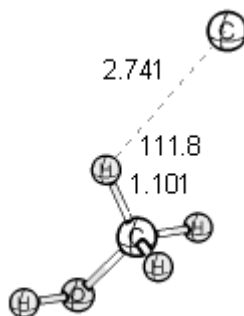

15T

| Atomic Number | X            | Coordinates (Angstroms)<br>Y | Z            |
|---------------|--------------|------------------------------|--------------|
| 1             | 0.549712000  | 1.465528000                  | 0.109265000  |
| 6             | 0.383922000  | 0.386076000                  | -0.015466000 |
| 8             | 1.595465000  | -0.342783000                 | -0.089456000 |
| 6             | -2.877570000 | -0.182586000                 | 0.019061000  |
| 1             | -0.260920000 | 0.035544000                  | 0.804578000  |
| 1             | 2.049976000  | -0.210028000                 | 0.742039000  |
| 1             | -0.140595000 | 0.230279000                  | -0.961807000 |

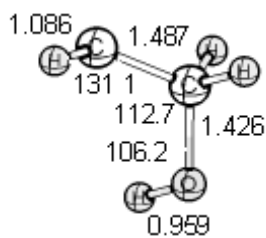

**16T**

| Atomic Number | X            | Coordinates (Angstroms)<br>Y | Z            |
|---------------|--------------|------------------------------|--------------|
| 1             | -1.761864000 | -0.974432000                 | 0.549541000  |
| 6             | -0.052645000 | 0.538565000                  | 0.000128000  |
| 8             | 1.107299000  | -0.285859000                 | 0.096895000  |
| 6             | -1.307272000 | -0.250086000                 | -0.120390000 |
| 1             | 0.023466000  | 1.240582000                  | -0.842950000 |
| 1             | 1.104577000  | -0.843237000                 | -0.683100000 |
| 1             | -0.065068000 | 1.133084000                  | 0.922924000  |

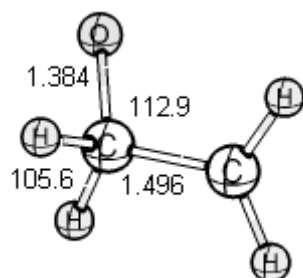

**17T**

| Atomic Number | X            | Coordinates (Angstroms)<br>Y | Z            |
|---------------|--------------|------------------------------|--------------|
| 8             | 1.190407000  | -0.361257000                 | -0.087182000 |
| 6             | -1.204930000 | -0.222498000                 | -0.021402000 |
| 6             | 0.108205000  | 0.487645000                  | 0.068350000  |
| 1             | -1.303374000 | -1.204023000                 | 0.429135000  |
| 1             | -2.065403000 | 0.247635000                  | -0.484714000 |
| 1             | 0.160800000  | 1.347673000                  | -0.617863000 |
| 1             | 0.265061000  | 0.907889000                  | 1.089209000  |

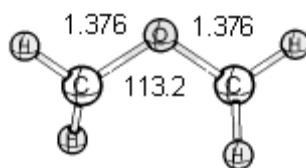

**18T**

| Atomic Number | X            | Coordinates (Angstroms) |              |
|---------------|--------------|-------------------------|--------------|
|               |              | Y                       | Z            |
| 6             | 0.000000000  | 1.148720000             | -0.225139000 |
| 8             | 0.000000000  | 0.000000000             | 0.532072000  |
| 6             | 0.000000000  | -1.148720000            | -0.225139000 |
| 1             | -0.029116000 | 2.046245000             | 0.381158000  |
| 1             | 0.559302000  | 1.121496000             | -1.158613000 |
| 1             | -0.559302000 | -1.121496000            | -1.158613000 |
| 1             | 0.029116000  | -2.046245000            | 0.381158000  |

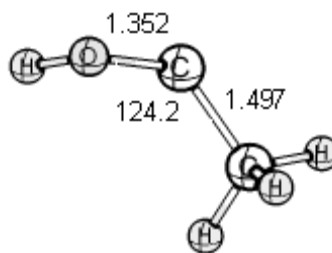

**19T**

| Atomic Number | X            | Coordinates (Angstroms) |              |
|---------------|--------------|-------------------------|--------------|
|               |              | Y                       | Z            |
| 6             | 0.098172000  | 0.518698000             | 0.021285000  |
| 6             | -1.253988000 | -0.122828000            | 0.007620000  |
| 8             | 1.260470000  | -0.157113000            | -0.116266000 |
| 1             | -2.028986000 | 0.646688000             | 0.061506000  |
| 1             | -1.399438000 | -0.700020000            | -0.917047000 |
| 1             | -1.384590000 | -0.806689000            | 0.860805000  |
| 1             | 1.664155000  | -0.258290000            | 0.751431000  |



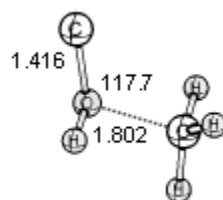

**1T/2**

Im. Freq. (cm<sup>-1</sup>) = -1364.3879

| Atomic Number | X            | Coordinates (Angstroms)<br>Y | Z            |
|---------------|--------------|------------------------------|--------------|
| 6             | -1.289997000 | -0.188982000                 | 0.021059000  |
| 8             | 0.385738000  | 0.453832000                  | -0.136927000 |
| 1             | -1.270482000 | -0.892777000                 | -0.804377000 |
| 1             | -1.294752000 | -0.640982000                 | 1.010089000  |
| 1             | 0.407047000  | 1.077866000                  | 0.605552000  |
| 1             | -1.937996000 | 0.674175000                  | -0.116240000 |
| 6             | 1.458378000  | -0.452508000                 | 0.045673000  |

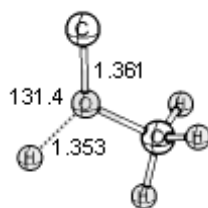

**1T/3**

Im. Freq. (cm<sup>-1</sup>) = -2601.2689

| Atomic Number | X            | Coordinates (Angstroms)<br>Y | Z            |
|---------------|--------------|------------------------------|--------------|
| 6             | 1.053374000  | -0.226168000                 | 0.000001000  |
| 1             | 1.754129000  | 0.611073000                  | -0.000227000 |
| 1             | 1.163657000  | -0.833012000                 | -0.900476000 |
| 1             | 1.163819000  | -0.832658000                 | 0.900698000  |
| 8             | -0.256217000 | 0.381003000                  | -0.000004000 |
| 6             | -1.375532000 | -0.393482000                 | 0.000003000  |
| 1             | -0.098923000 | 1.724475000                  | 0.000015000  |

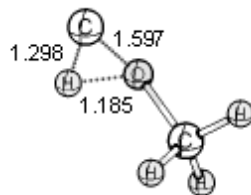

**1T/4T**

Im. Freq. (cm<sup>-1</sup>) = -1346.6098

---

| Atomic Number | X            | Coordinates (Angstroms) |  | Z            |
|---------------|--------------|-------------------------|--|--------------|
|               |              | Y                       |  |              |
| 6             | -1.440141000 | 0.376116000             |  | -0.050385000 |
| 6             | 1.079212000  | 0.216801000             |  | 0.016384000  |
| 8             | -0.138443000 | -0.548831000            |  | -0.092063000 |
| 1             | 1.303989000  | 0.624061000             |  | -0.971618000 |
| 1             | 0.948882000  | 1.034150000             |  | 0.731734000  |
| 1             | -0.849069000 | -0.362535000            |  | 0.837743000  |
| 1             | 1.869316000  | -0.462530000            |  | 0.342653000  |

---

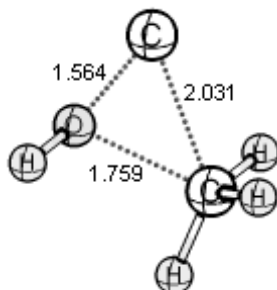

**1T/19T**

Im. Freq. (cm<sup>-1</sup>) = -1238.5887

---

| Atomic Number | X            | Coordinates (Angstroms) |  | Z            |
|---------------|--------------|-------------------------|--|--------------|
|               |              | Y                       |  |              |
| 6             | -1.034302000 | 0.084122000             |  | -0.009928000 |
| 8             | 0.561972000  | -0.643818000            |  | 0.120675000  |
| 6             | 0.829713000  | 0.889945000             |  | -0.024686000 |
| 1             | -1.483696000 | -0.899491000            |  | -0.183870000 |
| 1             | -1.255943000 | 0.462358000             |  | 0.981118000  |
| 1             | -1.276083000 | 0.778760000             |  | -0.810687000 |
| 1             | 0.747478000  | -1.035479000            |  | -0.744275000 |

---

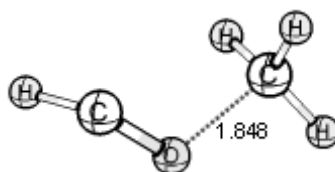

4T/5

Im. Freq. (cm<sup>-1</sup>) = -957.3543

---

| Atomic Number | Coordinates (Angstroms) |              |              |
|---------------|-------------------------|--------------|--------------|
|               | X                       | Y            | Z            |
| 6             | 1.340329000             | 0.172496000  | 0.004457000  |
| 8             | -0.372124000            | -0.520477000 | -0.059273000 |
| 1             | 1.390557000             | 0.592639000  | 1.005337000  |
| 1             | 1.932504000             | -0.722198000 | -0.161290000 |
| 1             | 1.339695000             | 0.892617000  | -0.810215000 |
| 6             | -1.311015000            | 0.255253000  | 0.168547000  |
| 1             | -1.861646000            | 0.834264000  | -0.597678000 |

---

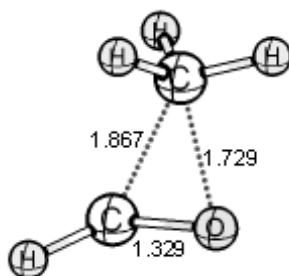

4T/6T

Im. Freq. (cm<sup>-1</sup>) = -1418.3065

---

| Atomic Number | Coordinates (Angstroms) |              |              |
|---------------|-------------------------|--------------|--------------|
|               | X                       | Y            | Z            |
| 8             | 0.477406000             | 0.734405000  | 0.023441000  |
| 6             | 0.808550000             | -0.539941000 | -0.154553000 |
| 1             | 1.414442000             | -1.129613000 | 0.543864000  |
| 6             | -1.008841000            | -0.148894000 | 0.017671000  |
| 1             | -1.559430000            | 0.791906000  | -0.098489000 |
| 1             | -1.279159000            | -0.814438000 | -0.806234000 |
| 1             | -1.193347000            | -0.590084000 | 0.994624000  |

---

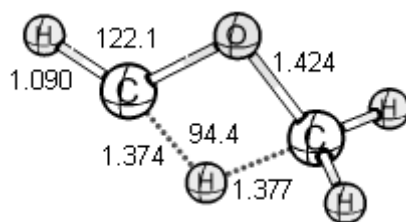

**4T/18T**

Im. Freq. (cm<sup>-1</sup>) = -2252.5272

| Atomic Number | X            | Y            | Z            |
|---------------|--------------|--------------|--------------|
| 6             | 0.991380000  | -0.224429000 | -0.019602000 |
| 8             | -0.115583000 | 0.670749000  | 0.015414000  |
| 6             | -1.021814000 | -0.356304000 | 0.061675000  |
| 1             | 1.599943000  | -0.122427000 | -0.918352000 |
| 1             | 1.519710000  | -0.309544000 | 0.929611000  |
| 1             | 0.038480000  | -1.213759000 | -0.109203000 |
| 1             | -2.050872000 | -0.235863000 | -0.277808000 |

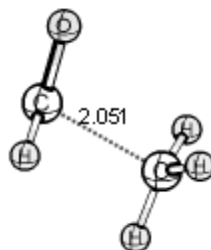

**6T/5**

Im. Freq. (cm<sup>-1</sup>) = -543.1638

| Atomic Number | X            | Y            | Z            |
|---------------|--------------|--------------|--------------|
| 6             | -1.406400000 | -0.146920000 | 0.010762000  |
| 6             | 0.512498000  | 0.550318000  | -0.185238000 |
| 8             | 1.235384000  | -0.388379000 | 0.051189000  |
| 1             | -1.972909000 | 0.747240000  | -0.236842000 |
| 1             | -1.393056000 | -0.930230000 | -0.740712000 |
| 1             | -1.445632000 | -0.478189000 | 1.045169000  |
| 1             | 0.291934000  | 1.347829000  | 0.569734000  |

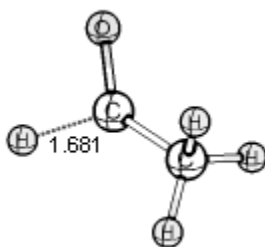

**6T/7**

Im. Freq. (cm<sup>-1</sup>) = -1258.7764

| Atomic Number | X            | Coordinates (Angstroms)<br>Y | Z            |
|---------------|--------------|------------------------------|--------------|
| 6             | -1.188116000 | -0.124524000                 | 0.057349000  |
| 6             | 0.249291000  | 0.261509000                  | -0.347029000 |
| 8             | 1.246410000  | -0.231249000                 | 0.109917000  |
| 1             | -1.891165000 | 0.662513000                  | -0.217194000 |
| 1             | -1.424004000 | -1.031024000                 | -0.510073000 |
| 1             | -1.245950000 | -0.340848000                 | 1.129247000  |
| 1             | 0.222782000  | 1.737439000                  | 0.456764000  |

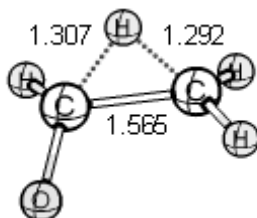

**6T/17T**

Im. Freq. (cm<sup>-1</sup>) = -1990.3751

| Atomic Number | X            | Coordinates (Angstroms)<br>Y | Z            |
|---------------|--------------|------------------------------|--------------|
| 6             | 1.166594000  | -0.209863000                 | -0.022634000 |
| 8             | -1.160109000 | -0.343309000                 | -0.066754000 |
| 6             | -0.210646000 | 0.524237000                  | 0.098101000  |
| 1             | 0.721833000  | 0.427645000                  | 1.009128000  |
| 1             | 1.132046000  | -1.275236000                 | 0.169985000  |
| 1             | 1.899650000  | 0.206859000                  | -0.705271000 |
| 1             | -0.208345000 | 1.500962000                  | -0.392610000 |

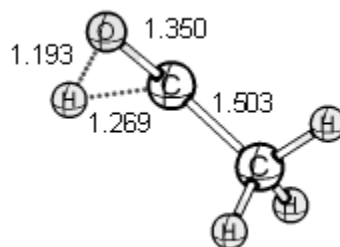

**6T/19T**

Im. Freq. (cm<sup>-1</sup>) = -2170.1007

---

| Atomic Number | X            | Y            | Z            |
|---------------|--------------|--------------|--------------|
| 6             | -1.243254000 | -0.106463000 | 0.035419000  |
| 8             | 1.297717000  | -0.238081000 | -0.010583000 |
| 6             | 0.141432000  | 0.437264000  | -0.181162000 |
| 1             | -1.462534000 | -0.852469000 | -0.739453000 |
| 1             | -1.338188000 | -0.585754000 | 1.019304000  |
| 1             | -1.975609000 | 0.700981000  | -0.042711000 |
| 1             | 1.005532000  | 0.657081000  | 0.721984000  |

---

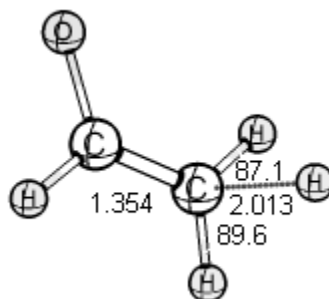

**6T/20**

Im. Freq. (cm<sup>-1</sup>) = -809.4916

---

| Atomic Number | X            | Y            | Z            |
|---------------|--------------|--------------|--------------|
| 6             | -1.089103000 | -0.073093000 | -0.209957000 |
| 6             | 0.151371000  | 0.409215000  | 0.041204000  |
| 8             | 1.280709000  | -0.278997000 | -0.000044000 |
| 1             | -1.913894000 | 0.625685000  | -0.260913000 |
| 1             | -1.224422000 | -1.071346000 | -0.609853000 |
| 1             | -1.813082000 | -0.781010000 | 1.529290000  |
| 1             | 0.332125000  | 1.441915000  | 0.354344000  |

---

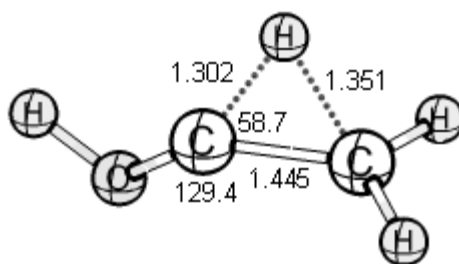

**13T/19T**

Im. Freq. (cm<sup>-1</sup>) = -2195.5977

| Atomic Number | X            | Coordinates (Angstroms)<br>Y | Z            |
|---------------|--------------|------------------------------|--------------|
| 6             | -1.293559000 | -0.138396000                 | -0.001391000 |
| 6             | 0.045700000  | 0.395427000                  | -0.102433000 |
| 1             | -1.549187000 | -0.746607000                 | 0.867520000  |
| 8             | 1.247630000  | -0.253317000                 | -0.029064000 |
| 1             | 1.899203000  | 0.392060000                  | 0.253212000  |
| 1             | -0.874209000 | 1.001334000                  | 0.591448000  |
| 1             | -1.969691000 | -0.162432000                 | -0.856722000 |

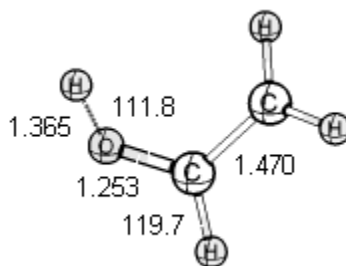

**13T/20**

Im. Freq. (cm<sup>-1</sup>) = -2282.6310

| Atomic Number | X            | Coordinates (Angstroms)<br>Y | Z            |
|---------------|--------------|------------------------------|--------------|
| 6             | -1.227062000 | -0.200322000                 | -0.004302000 |
| 6             | 0.070446000  | 0.490770000                  | -0.030845000 |
| 1             | -2.096304000 | 0.275446000                  | 0.438902000  |
| 8             | 1.144283000  | -0.153699000                 | -0.076429000 |
| 1             | 1.133049000  | -1.220277000                 | 0.775367000  |
| 1             | 0.093726000  | 1.574588000                  | 0.135792000  |
| 1             | -1.345043000 | -1.142852000                 | -0.527743000 |

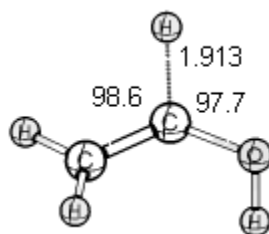

**13T/21**

Im. Freq. (cm<sup>-1</sup>) = -1121.5471

| Atomic Number | X            | Coordinates (Angstroms)<br>Y | Z            |
|---------------|--------------|------------------------------|--------------|
| 6             | -0.013887000 | 0.303381000                  | -0.297907000 |
| 8             | 1.216471000  | -0.092335000                 | 0.042797000  |
| 6             | -1.223276000 | -0.208085000                 | 0.031376000  |
| 1             | -0.075207000 | 1.891808000                  | 0.766724000  |
| 1             | -2.106709000 | 0.097754000                  | -0.516588000 |
| 1             | 1.230280000  | -1.054642000                 | 0.048136000  |
| 1             | -1.357153000 | -0.768012000                 | 0.958539000  |

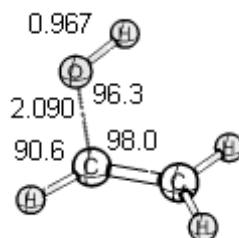

**13T/24**

Im. Freq. (cm<sup>-1</sup>) = -506.2182

| Atomic Number | X            | Coordinates (Angstroms)<br>Y | Z            |
|---------------|--------------|------------------------------|--------------|
| 6             | -0.436796000 | 0.724549000                  | -0.196325000 |
| 8             | 1.439989000  | -0.152292000                 | 0.081442000  |
| 6             | -1.187225000 | -0.356958000                 | 0.054904000  |
| 1             | -0.126313000 | 1.593206000                  | 0.367176000  |
| 1             | -1.540925000 | -1.004845000                 | -0.744938000 |
| 1             | 1.291685000  | -0.907448000                 | -0.504606000 |
| 1             | -1.400233000 | -0.668122000                 | 1.079358000  |



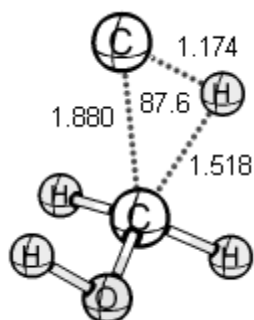

**15T/16T**

Im. Freq. (cm<sup>-1</sup>) = -765.5837

| Atomic Number | X            | Coordinates (Angstroms) |              |
|---------------|--------------|-------------------------|--------------|
|               |              | Y                       | Z            |
| 1             | 1.141155000  | 0.408582000             | -0.764812000 |
| 6             | -0.100597000 | 0.598152000             | 0.087827000  |
| 8             | -1.061981000 | -0.349345000            | -0.098784000 |
| 6             | 1.488472000  | -0.403338000            | 0.008258000  |
| 1             | 0.135966000  | 0.878883000             | 1.118734000  |
| 1             | -0.784852000 | -1.125298000            | 0.400495000  |
| 1             | -0.323667000 | 1.463709000             | -0.540659000 |

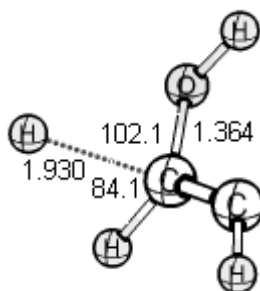

**16T/22**

Im. Freq. (cm<sup>-1</sup>) = -877.8054

| Atomic Number | X            | Coordinates (Angstroms) |              |
|---------------|--------------|-------------------------|--------------|
|               |              | Y                       | Z            |
| 6             | -1.218207000 | -0.384697000            | 0.052308000  |
| 8             | 1.176350000  | -0.151565000            | -0.008871000 |
| 6             | -0.092574000 | 0.311473000             | -0.197741000 |
| 1             | -2.275292000 | -0.177799000            | -0.017158000 |
| 1             | -0.284622000 | 1.570136000             | 1.253342000  |
| 1             | 1.113595000  | -0.943013000            | 0.531127000  |
| 1             | -0.099793000 | 1.202539000             | -0.823744000 |

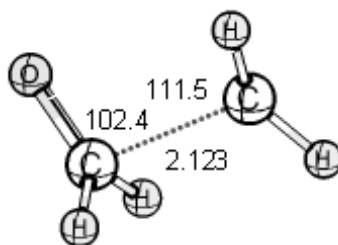

**17T/10T**

Im. Freq. (cm<sup>-1</sup>) = -489.4942

| Atomic Number | X            | Coordinates (Angstroms)<br>Y | Z            |
|---------------|--------------|------------------------------|--------------|
| 6             | 0.490603000  | 0.547953000                  | 0.067850000  |
| 8             | 1.159773000  | -0.478386000                 | -0.067572000 |
| 1             | 0.292875000  | 0.975391000                  | 1.066964000  |
| 1             | 0.302966000  | 1.226716000                  | -0.783620000 |
| 6             | -1.498246000 | -0.184693000                 | -0.057011000 |
| 1             | -2.231244000 | 0.595365000                  | -0.231057000 |
| 1             | -1.596929000 | -1.149948000                 | 0.423252000  |

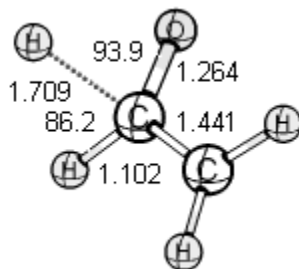

**17T/20**

Im. Freq. (cm<sup>-1</sup>) = -1099.6941

| Atomic Number | X            | Coordinates (Angstroms)<br>Y | Z            |
|---------------|--------------|------------------------------|--------------|
| 8             | 1.152191000  | -0.349580000                 | -0.025657000 |
| 6             | -1.195926000 | -0.197677000                 | 0.010208000  |
| 6             | 0.120060000  | 0.373985000                  | -0.124666000 |
| 1             | -1.289593000 | -1.208402000                 | 0.392656000  |
| 1             | -2.085048000 | 0.380138000                  | -0.220781000 |
| 1             | 0.190777000  | 1.358259000                  | -0.615420000 |
| 1             | 0.421533000  | 1.208792000                  | 1.335554000  |

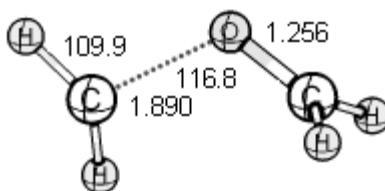

**18T/10T**

Im. Freq. (cm<sup>-1</sup>) = -847.5473

---

| Atomic Number | X            | Coordinates (Angstroms)<br>Y | Z            |
|---------------|--------------|------------------------------|--------------|
| 6             | -1.225990000 | 0.221365000                  | 0.035436000  |
| 8             | -0.246533000 | -0.558701000                 | -0.066998000 |
| 1             | -1.699669000 | 0.648791000                  | -0.857890000 |
| 1             | -1.580104000 | 0.558087000                  | 1.018073000  |
| 6             | 1.473009000  | 0.212895000                  | 0.067776000  |
| 1             | 1.544210000  | 1.222658000                  | -0.325676000 |
| 1             | 2.225709000  | -0.565489000                 | 0.082207000  |

---

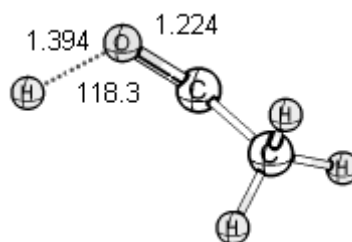

**19T/7**

Im. Freq. (cm<sup>-1</sup>) = -2097.4689

---

| Atomic Number | X            | Coordinates (Angstroms)<br>Y | Z            |
|---------------|--------------|------------------------------|--------------|
| 6             | 0.133664000  | -0.445083000                 | -0.203348000 |
| 6             | -1.247878000 | 0.119789000                  | 0.029305000  |
| 8             | 1.193520000  | 0.028962000                  | 0.185182000  |
| 1             | -2.012356000 | -0.634422000                 | -0.165003000 |
| 1             | -1.335769000 | 0.495311000                  | 1.055621000  |
| 1             | -1.390667000 | 0.956781000                  | -0.668351000 |
| 1             | 1.875916000  | 0.902390000                  | -0.659457000 |

---

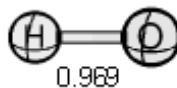

**Singlet OH radical**

---

| Atomic Number | X           | Coordinates (Angstroms) |              |  |
|---------------|-------------|-------------------------|--------------|--|
|               |             | Y                       | Z            |  |
| 8             | 0.000000000 | 0.000000000             | 0.107692000  |  |
| 1             | 0.000000000 | 0.000000000             | -0.861534000 |  |

---

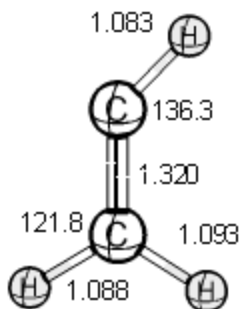

**Doublet CH<sub>2</sub>CH radical**

---

| Atomic Number | X            | Coordinates (Angstroms) |             |  |
|---------------|--------------|-------------------------|-------------|--|
|               |              | Y                       | Z           |  |
| 6             | 0.050319000  | -0.591615000            | 0.000000000 |  |
| 6             | 0.050319000  | 0.727906000             | 0.000000000 |  |
| 1             | -0.881459000 | -1.163714000            | 0.000000000 |  |
| 1             | 0.975174000  | -1.165410000            | 0.000000000 |  |
| 1             | -0.697549000 | 1.511375000             | 0.000000000 |  |

---

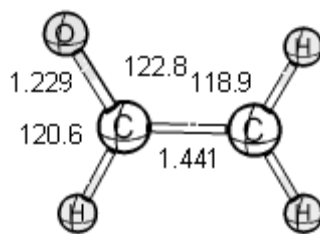

**Doublet CH<sub>2</sub>-CHO radical**

| Atomic Number | X            | Coordinates (Angstroms)<br>Y | Z           |
|---------------|--------------|------------------------------|-------------|
| 6             | 1.054737000  | -0.548006000                 | 0.000000000 |
| 6             | 0.000000000  | 0.433375000                  | 0.000000000 |
| 8             | -1.191233000 | 0.130838000                  | 0.000000000 |
| 1             | 2.099337000  | -0.252391000                 | 0.000000000 |
| 1             | 0.791421000  | -1.601012000                 | 0.000000000 |
| 1             | 0.310687000  | 1.494483000                  | 0.000000000 |

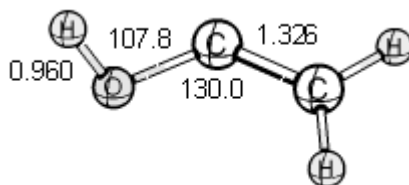

**Doublet CH<sub>2</sub>-COH radical**

| Atomic Number | X            | Coordinates (Angstroms)<br>Y | Z            |
|---------------|--------------|------------------------------|--------------|
| 6             | -0.027224000 | -0.418843000                 | -0.019522000 |
| 8             | 1.171108000  | 0.181358000                  | -0.080095000 |
| 6             | -1.243288000 | 0.108717000                  | 0.020143000  |
| 1             | -2.119418000 | -0.523230000                 | -0.055949000 |
| 1             | 1.747522000  | -0.250994000                 | 0.554551000  |
| 1             | -1.373892000 | 1.184121000                  | 0.138433000  |

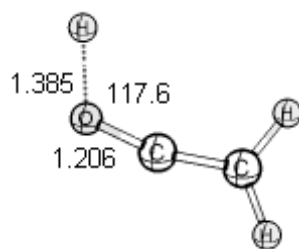

**TS CH<sub>2</sub>-COH/CH<sub>2</sub>-CO + H**

Im. Freq. (cm<sup>-1</sup>) = -2054.2230

| Atomic Number | X            | Coordinates (Angstroms) |             |
|---------------|--------------|-------------------------|-------------|
|               |              | Y                       | Z           |
| 6             | 0.000000000  | 0.183361000             | 0.000000000 |
| 8             | -1.203454000 | 0.101870000             | 0.000000000 |
| 6             | 1.291710000  | -0.065107000            | 0.000000000 |
| 1             | 1.625739000  | -1.099942000            | 0.000000000 |
| 1             | -1.760732000 | -1.165805000            | 0.000000000 |
| 1             | 2.012363000  | 0.741256000             | 0.000000000 |

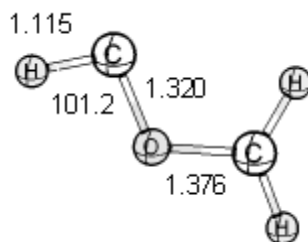

**Doublet CH<sub>2</sub>O-CH radical**

| Atomic Number | X            | Coordinates (Angstroms) |              |
|---------------|--------------|-------------------------|--------------|
|               |              | Y                       | Z            |
| 6             | -1.123755000 | 0.157390000             | -0.029800000 |
| 1             | -1.949043000 | -0.524193000            | 0.112660000  |
| 1             | -1.147601000 | 1.236447000             | 0.046976000  |
| 6             | 1.154112000  | 0.371940000             | 0.007480000  |
| 8             | 0.114469000  | -0.441450000            | -0.004787000 |
| 1             | 1.998747000  | -0.356634000            | 0.012580000  |

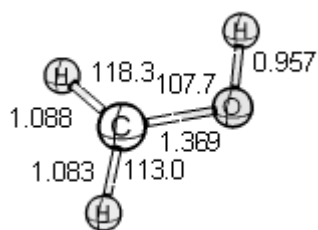

**Doublet CH<sub>2</sub>OH radical**

| Atomic Number | X            | Coordinates (Angstroms)<br>Y | Z            |
|---------------|--------------|------------------------------|--------------|
| 6             | 0.683972000  | 0.027744000                  | -0.076644000 |
| 8             | -0.672462000 | -0.124515000                 | 0.028601000  |
| 1             | 1.228577000  | -0.889796000                 | 0.111012000  |
| 1             | 1.119812000  | 0.982344000                  | 0.210171000  |
| 1             | -1.072524000 | 0.737111000                  | -0.090127000 |

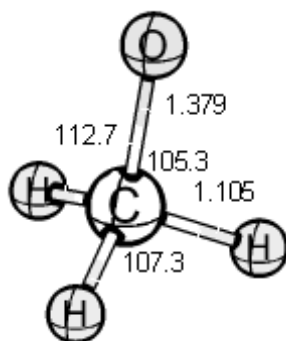

**Doublet CH<sub>3</sub>O radical**

| Atomic Number | X            | Coordinates (Angstroms)<br>Y | Z            |
|---------------|--------------|------------------------------|--------------|
| 8             | 0.009134000  | 0.797204000                  | 0.000000000  |
| 6             | 0.009134000  | -0.582033000                 | 0.000000000  |
| 1             | -1.056657000 | -0.872840000                 | 0.000000000  |
| 1             | 0.464389000  | -1.006298000                 | 0.906293000  |
| 1             | 0.464389000  | -1.006298000                 | -0.906293000 |

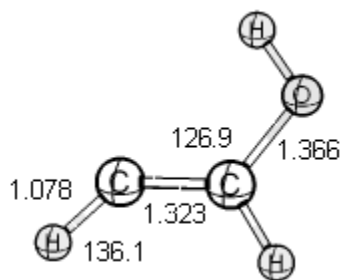

Doublet CH-CHOH radical

| Atomic Number | X            | Coordinates (Angstroms)<br>Y | Z            |
|---------------|--------------|------------------------------|--------------|
| 6             | -0.108911000 | 0.390289000                  | -0.000408000 |
| 8             | 1.166013000  | -0.099906000                 | 0.000135000  |
| 6             | -1.229653000 | -0.312228000                 | -0.000032000 |
| 1             | -0.110489000 | 1.480646000                  | 0.000760000  |
| 1             | -2.285292000 | -0.091785000                 | 0.000758000  |
| 1             | 1.099060000  | -1.057975000                 | 0.000049000  |

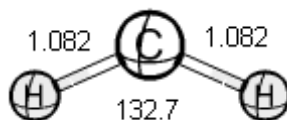

Triplet methylene

| Atomic Number | X           | Coordinates (Angstroms)<br>Y | Z            |
|---------------|-------------|------------------------------|--------------|
| 6             | 0.000000000 | 0.000000000                  | 0.108650000  |
| 1             | 0.000000000 | 0.991415000                  | -0.325951000 |
| 1             | 0.000000000 | -0.991415000                 | -0.325951000 |
